## 1 **Decision heuristics in contexts exploiting intrinsic skill**

2  
3 Neil M. Dundon<sup>1,2</sup>, Jaron T. Colas<sup>1</sup>, Neil Garrett<sup>5</sup>, Viktoriya Babenko<sup>1</sup>, Elizabeth Rizor<sup>1</sup>,  
4 Dengxian Yang<sup>3</sup>, Máirtín MacNamara<sup>4</sup>, Linda Petzold<sup>3</sup>, Scott T. Grafton<sup>1</sup>

5  
6 <sup>1</sup>Department of Psychological and Brain Sciences, University of California, Santa Barbara, CA  
7 93106, USA

8 <sup>2</sup>Department of Child and Adolescent Psychiatry, Psychotherapy and Psychosomatics, University  
9 of Freiburg, 79104 Freiburg, Germany

10 <sup>3</sup>Department of Computer Science, University of California, Santa Barbara, CA 93106, USA

11 <sup>4</sup>Janssen Pharmaceutica NV, Beerse, Belgium

12 <sup>5</sup>School of Psychology, University of East Anglia, Norwich Research Park, Norwich, NR4 7TJ,  
13 UK

### 14 **Abstract**

15  
16  
17 Heuristics can inform human decision making in complex environments through a reduction of  
18 computational requirements and a robustness to overparameterisation. However, tasks capturing  
19 the efficiency of reduced decision dimensionality typically ignore action proficiency in  
20 determining rewards. The value of movement parameterisation in sensorimotor control questions  
21 whether heuristics preserve efficiency when actions are non-trivial. We developed a novel  
22 selection-execution task requiring joint optimisation of action selection and spatio-temporal skill.  
23 Optimal choices could be determined by either a spatio-temporal forward simulation or a simpler  
24 spatial heuristic. Sequential-sampling models of action-selection response times parsimoniously  
25 distinguished human participants who adopted either strategy. Heuristics preserved broad  
26 decisional advantages over forward simulations. In addition, heuristics aligned with greater action  
27 proficiency, though predominantly through the core feature (spatial) shaping their decision policy.  
28 We accordingly reveal evidence that the dimensionality of information guiding action selection  
29 might be yoked to the granularity of plasticity in the motor system.

### 30 **Introduction**

31  
32  
33 In naturalistic settings, our cognitive architecture for making goal-oriented decisions typically  
34 resolves an ecological utility problem, integrating both extrinsic and intrinsic dynamics.  
35 Extrinsicly, selected actions should maximise reward capture in line with a complex external  
36 state - a soccer player in possession of the ball must select the most rewarding action (shoot or  
37 pass) by incorporating such parameters as their location relative to the goalposts, availability of  
38 teammates, wind direction, readiness of the opposition goalkeeper, and so on. While the player  
39 might base their decision on exhaustive forward simulations across all possible actions, such a  
40 highly dimensional external state likely favours some manner of goal-oriented heuristic, i.e., a  
41 decision formed from a subset of all available external state information (e.g., if within 10 metres  
42 of the goalposts, shoot). Behavioural evidence verifies that a human decision policy can span  
43 different levels of planning complexity, with emerging neural evidence further suggesting that the  
44 brain harbours separate neural controllers for heuristics<sup>1</sup>.

46 The logic underscoring heuristic adoption is at least two-fold. Heuristics first offer a trade-off  
47 between accuracy and available resources. That is, where exhaustive forward simulations might  
48 exceed computational resources or decision deadlines, heuristics offer a less laborious means to  
49 achieve a proxy for optimal action-selection policy<sup>1,2</sup>. An alternative "less-is-more" rationale,  
50 inspired by machine learning principles, considers heuristics as the optimal means to avoid  
51 overfitting in uncertain environments. That is, in uncertain environments, an overparameterised  
52 forward simulation will likely pick up on stochastic noise and create more prediction errors across  
53 choices than a function that uses fewer parameters, even if the latter function produces a biased  
54 estimate<sup>3</sup>.

55  
56 However, much like the areas of reinforcement learning and value-based decision making,  
57 evidence that humans adopt goal-oriented heuristics has emerged predominantly in contexts that  
58 do not consider intrinsic cost as a determining factor in reward yields. For example, in recent  
59 work<sup>1</sup>, simple button presses in a virtual task emulated foraging outcomes that probabilistically  
60 imparted a positive (partial increase), negative (partial decrease) or nonlinearly negative (complete  
61 erasure) impact on ongoing reward scores; human participants adopted a heuristic stimulus-driven  
62 policy that primarily avoided the nonlinear outcome, consistent with accuracy-resource trade-offs.  
63 Meanwhile, the less-is-more principle has been empirically supported in forecasting contexts such  
64 as weather<sup>3</sup>, investments<sup>4</sup> and sporting events<sup>5</sup>. Simple-action probabilistic emulations and  
65 forecasting can innovatively replicate much of the extrinsic reward-oriented cognitive challenges  
66 presented by dynamic naturalistic environments, however, they probe only one side of the  
67 ecological utility dilemma. Lost in both paradigm formats are additional cost dimensions  
68 associated with effort<sup>6,7</sup>, motor plasticity<sup>8,9</sup>, and a broader sense of agency<sup>10</sup>, all of which integrate  
69 with external factors in the ultimate utility of selected actions in naturalistic settings<sup>11,12</sup>.

70  
71 To our knowledge, no study has characterised heuristic adoption by humans when they select state-  
72 appropriate actions in selection-execution contexts, i.e., not only is there a correct action for a  
73 given state, but the proficiency of a selected action subsequently scales the level of reward and  
74 generates independent intrinsic error distributions such as spatial and temporal motor skill.  
75 According to sensorimotor control theory, such intrinsic error distributions are often attenuated by  
76 increasing the parameterisation of movement, e.g., by implementing forward-models or  
77 simulations<sup>27,28,29</sup>. This raises the question: do heuristics preserve their efficiency when actions are  
78 non-trivial; or do action values derived from parameterised utility assessments justify preserved  
79 use of forward simulations? We additionally do not know how decision heuristics relate to  
80 phenotypic variation in skill. On the one hand, higher skill should improve both the time to  
81 generate, and the subsequent predictiveness of, forward simulations, potentially rendering  
82 parameterisation a more rewarding option for higher-skilled individuals. However, an alternative  
83 prediction stems from the computational underpinnings of how motor learning evolves. Here, the  
84 commonly held view is that model-based deliberation dominates early in learning<sup>13</sup>, presumably  
85 while skill levels are also at their lowest. Thus if heuristics reflect a "model-free" antipode to  
86 model-based deliberation<sup>14</sup>, we might expect them to characterise planning in systems that have  
87 reached greater proficiency with the plant's output.

88  
89 Given their dynamic, non-punctuative nature, naturalistic states likely require action-selection  
90 deliberation to be a gradual process of evidence accumulation toward an action-deterministic  
91 criterion. Indeed, for decades, such a sequential-sampling framework has guided joint modeling

92 of choice and the dynamics constraining its underlying response-time distribution, revealing  
93 comprehensive accounts of decision formation in perceptual contexts<sup>15-18</sup>. A specific class of  
94 sequential sampling, the drift-diffusion model (DDM), has more recently linked model-based  
95 values to choice dynamics in reinforcement learning<sup>19,20</sup> and value-based decision making<sup>21,22</sup>. The  
96 DDM approach has a potential benefit over discrete (e.g., logistic) models, stemming not just from  
97 comprehensiveness<sup>23</sup>, but also from increased reliability<sup>19</sup> and robustness<sup>18</sup>. In the present work we  
98 use a DDM framework for the first time with data from a selection-execution task to distinguish  
99 people on their use of forward simulations or heuristics when selecting actions, and further  
100 hypothesise that these two groups might differ in terms of how skillfully they perform them.

101  
102 The novel task we developed scales trialwise reward based on the joint optimisation of action  
103 selection (between two possible actions) and subsequent action execution. Action execution is  
104 indexed by a tractable reward function and action proficiency is also decomposable into spatial  
105 and temporal error dimensions. Meanwhile, action selection can be guided by simulating reward  
106 from each action (i.e., incorporating both spatial and temporal dynamics), or by a simpler spatial  
107 heuristic. The forward and heuristic strategies therefore differ by a single, identifiable degree of  
108 freedom (temporal dynamics). In addition, for each trial one possible action is low-cost, while the  
109 other is high-cost. All environments can be solved with either action, however, certain  
110 environments favour the high-cost action in terms of reward yield. These asymmetric action costs  
111 first amplify the influence of effort, skill and agency. They further allow us to cull participants  
112 who do not behave in a goal-oriented manner, i.e., rarely (or never) selecting the high-cost, high-  
113 potential reward action. Thirdly, the degree of parametric bias toward the low-cost action offers a  
114 novel complement to the commonly used approach of tracking intrinsic motor error as a means to  
115 characterise low skill systems.

116  
117 Combining our novel task and seminal DDM framework, we first confirm that human participants  
118 can be identified by whether they predominantly use forward simulations or heuristics, with  
119 between-group parametric differences consistent with forward simulations requiring slower  
120 evidence accumulation to more conservative decision criteria. We next uncover strong evidence  
121 that heuristics remain efficient in action-execution contexts; heuristic planners made faster  
122 decisions, reached choice optimality sooner and, overall, obtained more reward. In addition,  
123 heuristic planners showed a striking skill profile. Overall, they demonstrated a higher level of  
124 spatial skill, relative to participants using forward simulations. However, unlike the latter group,  
125 heuristic participants demonstrated no learning across the task in the temporal domain. Their skill  
126 learning therefore centred on the key dimension incorporated into their planning strategy.  
127 Combined, our findings help unpack the broader dynamics of goal-oriented behaviour by revealing  
128 the first evidence of heuristic efficiency in a selection-execution context and that a yoked  
129 dimensionality might exist between planning and motor learning.

## 130 131 **Results**

132  
133 Fifty-three healthy human participants performed 360 trials (six runs of 60) of our novel  
134 "boatdock" task (Figure 1), in which reward yields require joint optimisation of action selection  
135 and action execution. On each trial, participants select one of two cursors to pilot between a  
136 randomly drawn start-goal pairing (SG; Figure 1a). Each cursor accelerates continuously in three  
137 unique orthogonal directions (Figure 1b), burning fuel any time an accelerator button (throttle -

138 Figure 1c) is down. One cursor imparts a higher motor execution cost via an incongruent key-  
 139 mapping (Figure 1c). However, trialwise reward is contingent on fuel conservation, such that a  
 140 selection policy that harnesses the relative orthogonality of the two cursors' directionality, and  
 141 selects the cursor better suited to each SG, will yield higher reward. The two cursors accelerate  
 142 with the same nonlinear function, and deplete fuel with the same linear function, i.e., faster  
 143 displacement is more fuel efficient (Figure 1d). A maximum docking displacement rule (Figure  
 144 1d), imposing a speed limit on arrival, imparts additional temporal control demands. Thus, in  
 145 addition to fewer direction changes (spatial error), greater temporal control maximises reward  
 146 (Figs. 1f, 1g). Finally, participants receive no reward for "catastrophic errors" (Figure 1e): when  
 147 they run out of fuel, leave the grid, or attempt to dock above the maximum docking displacement.  
 148

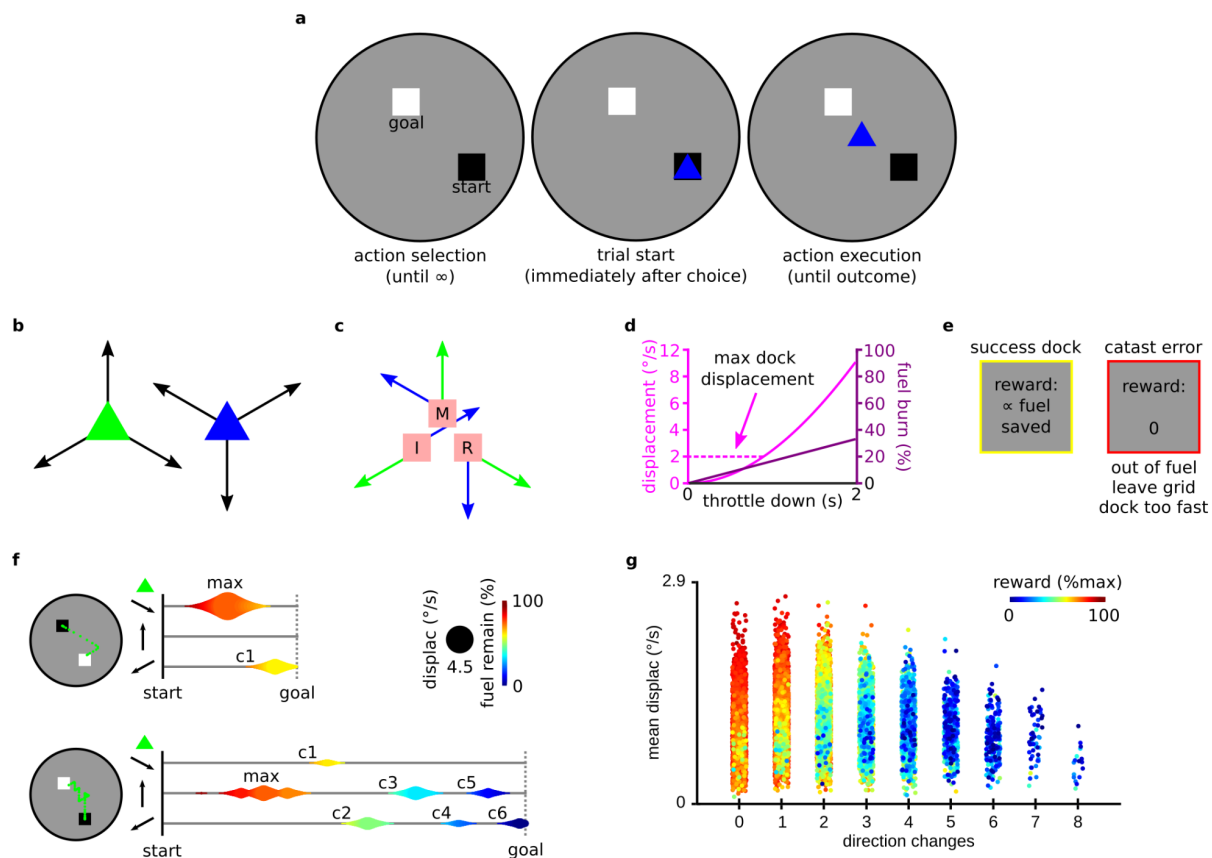

149  
 150  
 151  
**Figure 1 - Task outline.** **a**, on each trial, participants pilot one of two cursors from  
 152 a start to a goal (SG). **b**, each cursor can accelerate in three unique orthogonal  
 153 directions. **c**, position of index (I), middle (M) and ring (R) finger of right hand on  
 154 throttle buttons throughout the experiment, and cursor-specific throttle-vector  
 155 mapping. Fuel burns any time a throttle is pushed down. Each trial allows six  
 156 cumulative seconds of throttling before fuel depletes. **d**, throttle time linearly burns  
 157 fuel, but nonlinearly increases displacement. Faster displacement is therefore more  
 158 fuel efficient, however, a maximum dock displacement imparts additional temporal  
 159 control requirements. **e**, successful docks yield a reward contingent on fuel  
 160 conservation. This requires jointly maximising cursor choice for a given SG (action  
 161

162 selection) in addition to spatial and temporal precision (action execution). Trials  
163 containing catastrophic errors - running out of fuel, leaving the grid, or docking  
164 above maximum displacement - yield no reward. **f**, schematic of two similar SGs  
165 with the same cursor but different performance dynamics. Three horizontal lines in  
166 each panel chart activity over time separately for each vector, while each vortex  
167 relates to a single throttle pulse. Top panel utilises fewer direction changes (marked  
168 with  $c_1, \dots, c_n$ ), reaches a higher maximum displacement (depicted by diameter of  
169 largest vortex) and yields higher reward (depicted by colour). **g**, reward (depicted  
170 by colour), yielded on every successful trial across all participants (individual  
171 markers), is a joint function of spatial and temporal precision.  
172

### 173 *Forward simulations vs heuristics*

174 We hypothesised that participants might select the cursor yielding the highest reward from forward  
175 modeling of simulated routes, i.e., incorporating both the spatial and temporal constraints on  
176 reward optimisation into their choice (route planning; Figure 2a). Alternatively, participants might  
177 use a simple rule: select the cursor with a vector subtending the smallest angular offset to that of  
178 the SG, i.e., incorporating only spatial constraints on reward optimisation into their choice  
179 (heuristic; Figure 2b). Differences between these two approaches result in an imperfect correlation  
180 of action value across all trials. Specifically, the nonlinear nature of the temporal dynamics  
181 uniquely incorporated by route planning creates greater action-value deviance on trials where the  
182 SG covers smaller Euclidean distances (Figure 2d). Across all participants, the reaction time (RT)  
183 for action selection was slower in SGs where either strategy computed equivalent value for either  
184 cursor (Figure 2c), suggesting first that these policies modulate decision formation, and secondly,  
185 that difficulty or conflict (known to modulate drift parameter ( $\mu$ ) in perceptual contexts) could be  
186 further characterised in a DDM model.  
187

### 188 *DDM framework distinguishes individual-participant strategy*

189 The DDM (Figure 2e) describes a noisy sequential sampling process, which originates at a starting  
190 point ( $b_c B$ ), and accumulates evidence at an average "drift" rate ( $\mu$ ) before reaching a decision  
191 criterion or "boundary" ( $B$  or  $-B$  for congruent or incongruent cursors, respectively). In perceptual  
192 contexts, difficulty reduces the gradient of evidence accumulation, which can be verified  
193 computationally when models containing two drift rates (e.g.,  $\mu_1$  and  $\mu_2$ ) mapping respectively  
194 onto decisions presenting a high or low degree of difficulty, provide better model fits (Figure 2e).  
195 The goal of our DDM framework was to distinguish people based on whether they used a forward  
196 simulation or heuristic to guide decisions (Figs. 2a-b). We therefore formally considered a  
197 participant to be using a specific strategy if their evidence accumulation was best modulated by  
198 difficulty arising from it. To each participant's set of trialwise choices and RTs, we fitted a total of  
199 three DDMs, each containing free parameters for  $b_c B$ ,  $B$ , and nondecision time  $t_0$ . The null model  
200 was constrained such that  $\mu_1 = \mu_2 = 0$ , while the route-planner and heuristic models had two free  
201 parameters,  $\mu_1$  and  $\mu_2$ , mapping respectively onto high or low difficulty as calculated by either  
202 forward simulations or angular offset (Figs. 2a-b.). Based on model fits<sup>24</sup> after adjusting for model  
203 complexity according to the Akaike information criterion with correction for finite sample size  
204 (AICc)<sup>25,26</sup>, we confirmed that 19 participants' choice and RT data were best fitted by the route-  
205 planner model, 14 participants' data were best fitted by the heuristic model, while a third group of  
206 20 participants were best fitted by the null model, indicating neither strategy-specific difficulty  
207 modulated the rate of their evidence accumulation (Table 1). We hence refer to these three groups



208 respectively as the "route", "heuristic" and "nonplanner" groups (see Table 1 for group-specific  
 209 DDM parameter and behaviour summaries). The remaining portion of these results will describe  
 210 hypothesis-driven contrasts between the route and heuristic groups, in terms of DDM parameters,  
 211 choice behaviour and skill. However, for completeness, we include data from the nonplanner group  
 212 in Figure 3 and Supplementary Table 1, and also include a supplementary section summarising  
 213 their parametric and skill findings (see Supplementary Materials: *Nonplanner group*).  
 214

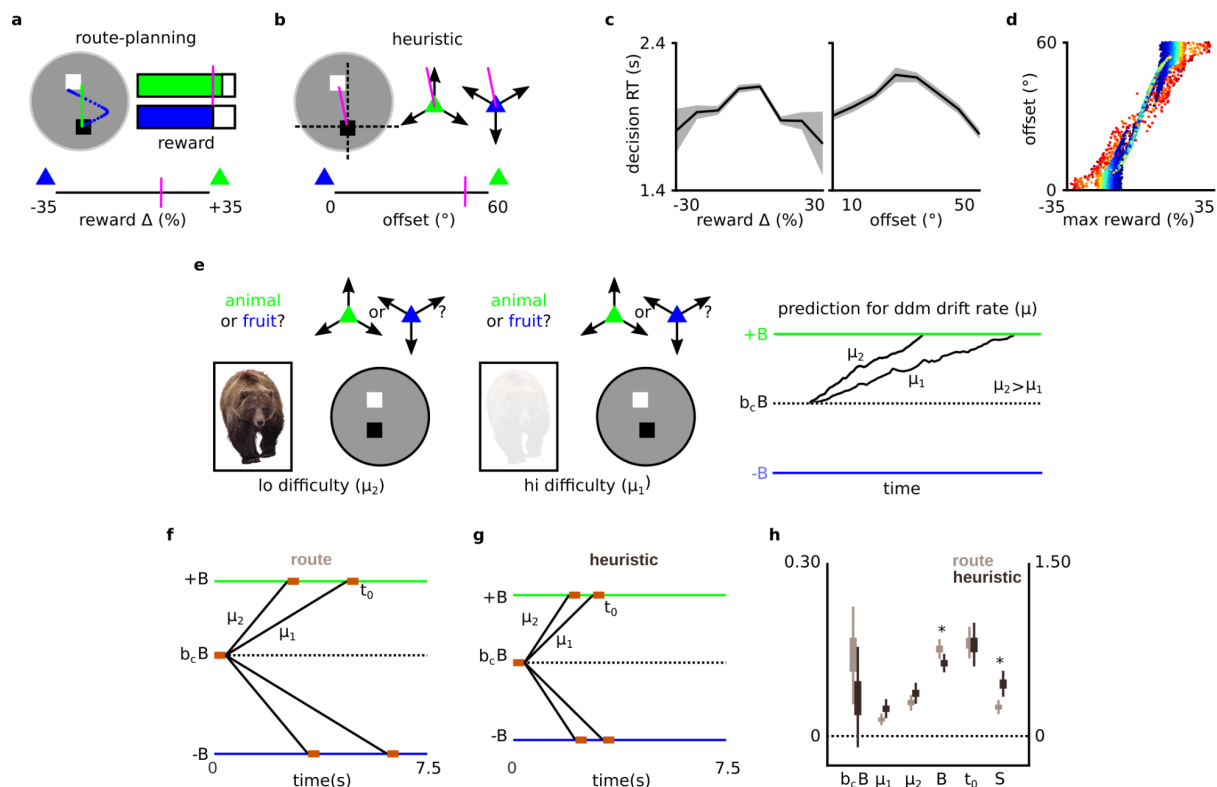

215  
 216

217 **Figure 2 - Action-selection policy identified by sequential sampling**  
 218 **framework.** **a-b**, route planning selects the cursor in accordance with the delta  
 219 between reward yields estimated from forward simulations with both cursors, i.e.,  
 220 incorporating both spatial and temporal task constraints into choice. A lower-  
 221 dimensional heuristic instead selects the cursor with a displacement vector with the  
 222 least angular offset to that described by the SG, i.e., incorporating only spatial  
 223 information. **c**, across participants, both strategies create more difficult decisions,  
 224 indexed by greater reaction time (RT) for action selection, on SGs where strategies  
 225 ascribe equivalent value to both cursors. Here, solid black lines in each panel  
 226 connect the means of nine RT bins after first sorting all participants' trials by  
 227 relevant policy value. Gray shaded area depicts the standard error of the mean in  
 228 each RT bin. **d**, strategy-specific action values are imperfectly positively correlated.  
 229 Each individual marker describes the relation between individual action values  
 230 derived from the route-planning and heuristic strategy across all trials from all  
 231 participants. Hotter colors describe greater Euclidean distance between S and G,  
 232 i.e., route-planning and heuristic strategy maximally deviates with shorter-distance

233 SGs. **e**, DDM framework, in which a noisy evidence accumulation process  
 234 terminates at a decision criterion. We hypothesised that difficulty arising in our task  
 235 would modulate the rate of evidence accumulation (drift rate  $\mu$ ) in a manner similar  
 236 to that observed in perceptual tasks, and that comparison of strategy-specific  
 237 difficulty modulation would identify individual-participant policy. For each  
 238 participant's choice and RT data, two target models allowed separate drift rates  $\mu_1$   
 239 and  $\mu_2$  for high and low difficulty, respectively as per route-planning and heuristic  
 240 strategy. Three groups of participants emerged, based on whether their data were  
 241 best fitted by the route-planning (n=19), heuristic (n=14) or null (n=20) models (see  
 242 also Table 1). **f-g**, scaled schematic of DDM profile estimated for route-planning  
 243 (route) and heuristic groups. **h**, comparison of DDM parameters between route and  
 244 heuristic group consistent with the former integrating additional information (i.e.,  
 245 temporal dynamics) into decision formation. Boxes and thin lines respectively  
 246 represent the interquartile range (IQR) and highest density interval (HDI) of the  
 247 posterior mean constraining individual-participant estimates of each parameter.  
 248 Route group demonstrated a slower process of evidence accumulation toward a  
 249 larger decision criterion; combining drift rates and decision criterion as part of a  
 250 sensitivity metric  $S=(\mu_1+\mu_2)/(2B(1+b_cB))$  we observe strong Bayesian evidence  
 251 of group-level difference. This effect was primarily driven by the decision criterion,  
 252 as the route group boundary ( $B$ ) was also credibly higher than that of the heuristic  
 253 group. In addition, the route group starting point ( $b_cB$ ) was credibly above 0,  
 254 indicating a bias toward the low-cost cursor. Asterisk indicates no overlap in  
 255 groups' posterior HDIs for a given parameter. All parameters expressed in units of  
 256  $\mu$ , except  $t_0$  (in seconds). Note that  $t_0$  and  $S$  parameters are aligned with the right  
 257 axis for clarity.

258  
 259 **Table 1.** Participant groups and DDM parameters  
 260

|                                       | <b>non</b>    | <b>route</b>  | <b>heuristic</b> |
|---------------------------------------|---------------|---------------|------------------|
| n (site1:site2)                       | 20 (7:13)     | 19 (6:13)     | 14 (3:11)        |
| p(optimal cursor)                     | [0.477,0.500] | [0.668,0.690] | [0.706,0.730]    |
| p(congruent cursor)                   | [0.716,0.736] | [0.564,0.587] | [0.528,0.555]    |
| p(catastrophic error)                 | [0.169,0.186] | [0.120,0.135] | [0.110,0.126]    |
| median response time (s)              | [0.779,1.351] | [1.873,2.672] | [1.485,2.191]    |
| sensitivity - $S$                     | 0             | [0.192,0.316] | [0.330,0.564]    |
| drift rate, high difficulty - $\mu_1$ | 0             | [0.019,0.040] | [0.030,0.062]    |
| drift rate, low difficulty- $\mu_2$   | 0             | [0.044,0.073] | [0.054,0.093]    |

|                                                        |               |               |                |
|--------------------------------------------------------|---------------|---------------|----------------|
| boundary - $B$                                         | [0.065,0.146] | [0.134,0.168] | [0.108,0.143]  |
| starting point - $b_c B$                               | [0.127,0.405] | [0.059,0.236] | [-0.024,0.164] |
| nondecision time - $t_0$ (s)                           | [0.380,0.661] | [0.666,0.961] | [0.585,0.977]  |
| route-planning DDM model:<br>residual deviance - $D_2$ | 0.2           | 213.3         | 202.3          |
| heuristic DDM model:<br>residual deviance - $D_2$      | 0.1           | 171.2         | 238.8          |

261  
262  
263  
264  
265  
266  
267  
268  
269  
270  
271

*Notes: values in square brackets for  $p(\text{congruent cursor})$ ,  $p(\text{optimal cursor})$  and  $p(\text{catastrophic error})$  describe the bounds [upper,lower] of the HDI of group-level probability ( $\theta_{v,g}$ : see methods) from a summary binomial model. Values in square brackets for all other parameters describe HDI for group-level mean ( $M_{v,g}$ : see methods) from a summary Gaussian model. Drift rates ( $\mu_1$  and  $\mu_2$ ) describe rates of evidence accumulation per second toward Boundary ( $B$ ), which is expressed in units of drift rate ( $\mu$ ). Starting point  $b_c B$  is expressed as a proportion from  $-B$  to  $B$ . Sensitivity,  $S=(\mu_1+\mu_2)/(2B(1+|b_c B|))$ . Higher values of residual deviances ( $D_2$ ) reflect better model fits across a group's participants relative to the null model.*

272  
273  
274  
275  
276  
277  
278  
279  
280  
281  
282  
283  
284  
285  
286  
287  
288  
289  
290  
291  
292  
293  
294  
295

We next tested whether individual-participant DDM parameters were consistent with group classifications ascribed by the model fit scores to the route and heuristic groups (Table 1, Figure 2h). By definition, route planning incorporates a larger volume of information into decisions, relative to the heuristic, which can be computationally indexed by more gradual evidence accumulation and or a broader decision criterion. We employed a Bayesian framework (see Methods) that estimated group-specific summaries of each DDM parameter listed in Table 1 in a single model, and further only considered strong Bayesian evidence of between-group parameter differences, i.e., where the highest density interval (HDI) of deterministic distributions of parameter differences did not contain zero. We first observed strong evidence of group difference for the sensitivity metric  $S=(\mu_1+\mu_2)/(2B(1+|b_c B|))$  that combines the rate of evidence accumulation with the extent of the decision criterion ( $S \Delta(\text{route-heuristic}) \text{ HDI}=[-0.322,-0.056]$ ). Credibly lower sensitivity amongst the route group is consistent with the above prediction that their employed policy integrates a greater volume of information, as this metric is low when decision formation is jointly constrained by a low rate of evidence accumulation and larger decision criterion (Figure 2f). This effect was primarily driven by the decision criterion, as we additionally observed the route group to have a credibly higher boundary ( $B$ ) than the heuristic group ( $B \Delta(\text{route-heuristic}) \text{ HDI}=[0.002,0.050]$ ), while not credibly differing across the two drift rates ( $\mu_1 \Delta(\text{route-heuristic}) \text{ HDI}=[-0.036,0.002]$ ;  $\mu_2 \Delta(\text{route-heuristic}) \text{ HDI}=[-0.040,0.008]$ ). Also of note, we observed a credible bias toward the low cost action amongst the the route ( $b_c B_{\text{route}} \text{ HDI}=[0.057,0.233]$ ), but not amongst the heuristic group ( $b_c B_{\text{heuristic}} \text{ HDI}=[-0.026,0.161]$ ). Together, these findings provide parametric plausibility to the DDM classifications, and argue that the route group's lengthier trialwise decision deliberations stemmed from a greater volume of information integration, potentially stemming from a stronger bias toward using the low-cost cursor.



296 We next tested whether, on a broader macroscopic level, the route planner's computationally-  
297 intensive action selection delayed the emergence of optimality in their choice policy. For this, we  
298 summarised choice optimality across time-on-task using a hierarchical binomial model. The model  
299 estimated parameters of hierarchical Beta posterior distributions that constrained individual-  
300 participant binomial posteriors summarising their likelihood of selecting the optimal cursor in a  
301 run of trials, across a two-dimensional space described by group (route, heuristic, nonplanner) and  
302 run (1-6). From hierarchical Beta posteriors we deterministically computed credible ranges of  
303 group-specific choice optimality ( $\theta$ ) for each run, presented in Figure 3a. Consistent with  
304 optimality delay, the route group's choice behaviour (i.e.,  $p(\text{optimal})$ ) did not credibly depart  
305 chance (0.50) until the fourth run of trials ( $\theta_{\text{route,run4}}$  HDI=[0.533,0.882]), while in contrast, the  
306 heuristic group demonstrated above-chance choice optimality by the second run of trials ( $\theta_{\text{heuristic,run2}}$   
307 HDI=[0.501,0.898]; Figure 3a, see Supplementary Table 1 for each group-by-run  $\theta$  HDI). This  
308 relative delay-to-optimality of approximately 120 trials provides further support that the route  
309 group mediated over a larger volume of evidence prior to action selection and further suggests a  
310 trade-off between how quickly a policy produces state-relevant choices, and the dimensionality of  
311 constituent planning.

312  
313 Finally, in a supplementary analysis (see: Supplementary Materials - *Hierarchical logistic choice*  
314 *model*), we confirm that route and heuristic groups uniquely integrate extrinsic state information  
315 into choices (relative to nonplanners), and also confirm that the route group had a more pronounced  
316 bias toward the low-cost action, relative to the heuristic group, mirroring their bias revealed by the  
317 DDM. This supplementary analysis further revealed speculative evidence that the route group's  
318 planning strategy was not born purely out of risk-aversion, and that they instead potentially  
319 reserved high-cost action usage early in the task to states with longer SGs, where, due to nonlinear  
320 temporal task dynamics, state-appropriate choice offered disproportionately greater action value.

### 321 322 *Comparisons of skill between route and heuristic groups*

323 We have so far verified that a DDM framework parsimoniously distinguishes people on their likely  
324 use of forward simulations or heuristics during action selection in a selection-execution task, in a  
325 manner that is both parametrically consistent with the underlying characteristics of each strategy  
326 and in line with trade-offs between the expediency and profundity of policy formation. We next  
327 tested whether these two groups (identified solely using action-selection RT data) also differed in  
328 terms of action-execution skill and skill learning. We again employed a Bayesian framework that  
329 minimised the total number of fitted models and only considered strong evidence.

330  
331 We first enumerated performance on each trial in terms of three skill variables: reward, spatial  
332 action execution and temporal action execution. Reward was the proportion of the fuel tank  
333 conserved on each trial, i.e., higher values reflect better performance on this measure which is  
334 modulated by the complete set of action-execution variables. Spatial action execution was the  
335 number of direction changes on each trial, i.e., lower values reflect better performance on this  
336 measure which is modulated specifically by spatial precision. Temporal action execution was the  
337 normalised difference between the cursor's maximum and final velocity, i.e., higher values reflect  
338 better performance on this measure that indexes proficiency in temporal task demands requiring  
339 high max-velocities for more fuel-efficient displacement, while arriving at the goal below the  
340 maximum threshold (Figure 1d), and ideally lower, to further preserve fuel. We next summarised  
341 performance in these three variables across the task using three separate hierarchical Bayesian

342 models. Each model estimated hierarchical Gaussian (reward, temporal skill) or Poisson (spatial  
343 skill) posterior distributions that constrained individual-participant posterior distributions. We  
344 further fitted each model's hierarchical structure across a mixed three-dimensional space, i.e., first  
345 between-group (route, heuristic, nonplanner) and then within-group, separately for each run (1-6)  
346 and selected cursor (congruent, incongruent). In other words, each model estimated the credible  
347 ranges of group-mean performance for its given variable, separately for each run, and separately  
348 again for each cursor. Figures 3b-d and Supplementary Table 1 contain each group-by-cursor-by-  
349 run  $\mu$  HDI for each measure and deterministic HDIs collapsed across run.

350  
351 In terms of overall performance, the heuristic group garnered higher reward yields with the high-  
352 cost (incongruent) cursor (Figure 3b), which were at least partially attributable to a higher level of  
353 spatial skill (Figure 3c). Merging posteriors across runs, the route and heuristic groups showed no  
354 credible differences in reward yielded using the congruent cursor ( $\mu \Delta(\text{route-heuristic}) \text{HDI}=[-0.017,0.025]$ ,  
355 Figure 3b), however the heuristic group amassed credibly higher yields using the  
356 incongruent cursor ( $\mu \Delta(\text{route-heuristic}) \text{HDI}=[-0.055,-0.006]$ , Figure 3b). This result was  
357 mirrored in spatial skill, where we again observed no credible between-group difference with the  
358 congruent cursor ( $\mu \Delta(\text{route-heuristic}) \text{HDI}=[-0.159,0.142]$ , Figure 3c), but credibly fewer  
359 direction changes amongst the heuristic group with the incongruent cursor ( $\mu \Delta(\text{route-heuristic})$   
360  $\text{HDI}=[0.011,0.358]$ , Figure 3c). In contrast, we observed no between-group differences in  
361 temporal skill, with either the congruent ( $\mu \Delta(\text{route-heuristic}) \text{HDI}=[-0.018,0.056]$ , Figure 3d)  
362 or incongruent ( $\mu \Delta(\text{route-heuristic}) \text{HDI}=[-0.068,0.007]$ , Figure 3d) cursor. Given that the  
363 heuristic group reached state optimal choices more quickly (Figure 3a; Supplementary Table 1),  
364 i.e., they performed a higher volume of trials where their cursor selection theoretically reduced the  
365 need for direction changes, we re-ran the model with trialwise direction changes adjusted by the  
366 optimal solution for the cursor selected for each given trial (i.e., observed changes - ideal changes).  
367 This model (see: Supplementary Materials - *Hierarchical Poisson with choice-normalised spatial*  
368 *skill*) returned identical results, confirming that notwithstanding their better choices, the heuristic  
369 group independently demonstrated greater spatial precision while piloting the incongruent cursor.  
370

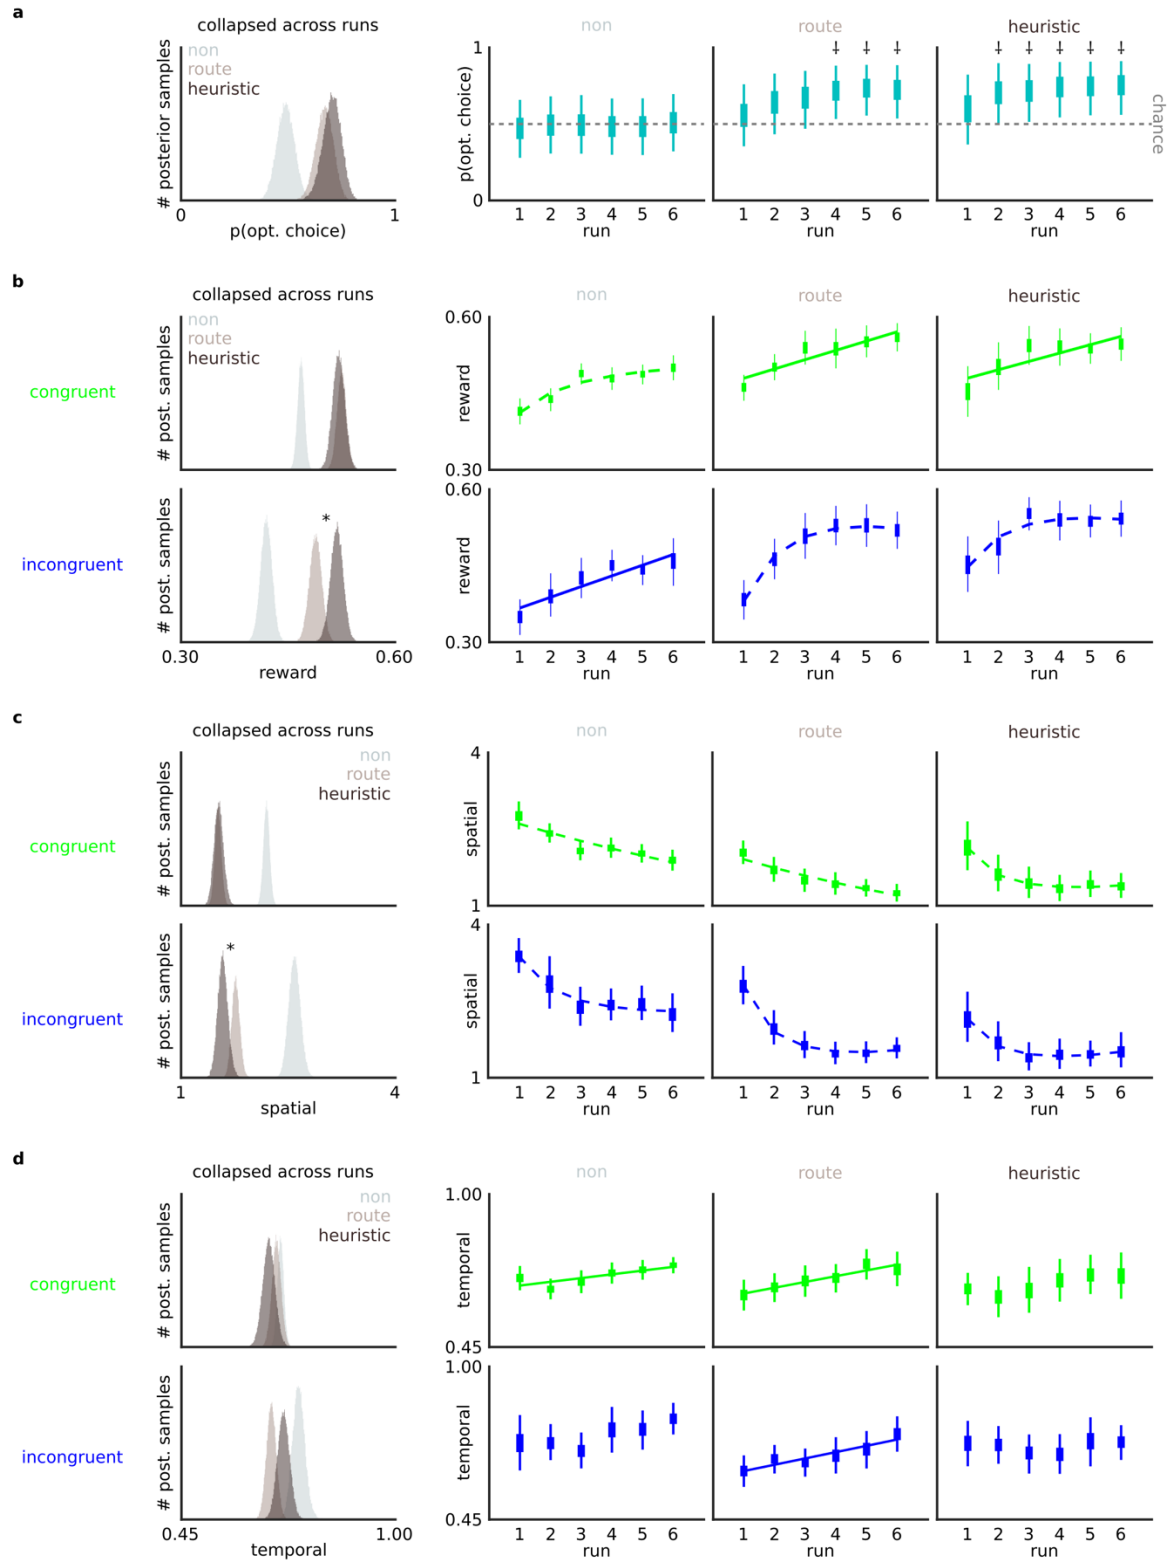

**Figure 3 - Heuristics group reach choice optimality more quickly and show a spatial-specific skill advantage. a**, consistent with classic decision-heuristic models, low dimensional planning aligns with faster trajectories toward choice

371  
372  
373  
374  
375

376 optimality. Hierarchical binomial model of choice behaviour demonstrates trade-  
377 off between the expediency and profundity of policy formation; heuristic group  
378 exceeded chance optimality by run 2, earlier than route group (run 4). † reflects runs  
379 where HDI of group-level  $\theta$  posterior did not subtend 0.50, i.e., where group-level  
380 proportion of choices were credibly above chance optimality. **b-d** skill and skill  
381 learning consistent with yoked dimensionality between planning and motor  
382 plasticity. Collapsing group-level posterior means across runs (skill) heuristic  
383 group yielded more reward with the high-cost cursor (**b**, histograms bottom panel),  
384 driven by superior spatial skill (**c**, histograms bottom panel), with no route-heuristic  
385 difference in temporal skill (**d**, histograms). Asterisk relates to credible difference  
386 between route and heuristic groups, i.e., that the HDI of the deterministic  
387 distribution of their difference (route - heuristic) does not contain 0. Additionally,  
388 while route and heuristic group demonstrated skill learning in terms of reward and  
389 spatial skill (**b-c**, line plots), route group uniquely demonstrated learning in the  
390 temporal domain (**d**, line plots). Boxes and thin lines in line plots respectively  
391 represent IQR and HDI of hierarchical posterior means constraining individual-  
392 participant posteriors for a given measure, run and cursor. In both histograms and  
393 line plots, reward is the proportion of fuel preserved per trial (higher better), spatial  
394 is the number of direction changes (fewer better) and temporal is the distance-  
395 normalized difference between max and final velocity (higher better). Time-on-task  
396 (skill learning) effects estimated from deterministic regression models fitted across  
397 draws from each run's posterior; credible ( $0 \notin$  coefficient HDI) effects depicted by  
398 either a dashed (logarithmic) or solid (linear) line. Absence of any line reflects non-  
399 credible effect.

400  
401 We next probed whether the route and heuristic groups differed in terms of time-on-task  
402 trajectories of specific skill features (skill learning). For this, we drew samples from each skill  
403 variable's uncollapsed runwise posterior distributions and tested with a deterministic regression  
404 model whether performance in each group-cursor dyad evolved across runs in either a linear or  
405 logarithmic fashion (linear and nonlinear time-on-task effects). Here we again observed  
406 divergence between the route and heuristic groups, with the route group's skill improvements  
407 encompassing a broader range of motor control features (Figure 3b-d, see Supplementary Table 1  
408 for each group-by-run skill measure  $\mu$  HDI, and HDIs of time-on-task effects). Specifically, the  
409 route group showed either linear or logarithmic improvement with each cursor across all variables,  
410 while in contrast, the heuristic group only showed strong evidence of improvement for reward  
411 yields and spatial skill, i.e., they demonstrated no time-on-task improvements with either cursor in  
412 the realm of temporal skill. To further support this null result, we conducted a follow-up analysis.  
413 This nonparametric analysis used more liberal criteria to establish temporal time-on-task effects at  
414 the individual-participant-level, and a binomial design that could confirm different trajectories  
415 between groups. Using summary values from individual-level posteriors, we quantified the number  
416 of participants from each group that showed either logarithmic or linear temporal time-on-task  
417 improvement, separately for each cursor. Confirmed via Bayesian binomial contrast, a greater  
418 proportion of the route group improved in temporal skill relative to the heuristic group, both using  
419 the congruent boat (10/19 vs 1/14;  $\theta \Delta(\text{route-heuristic}) \text{ HDI}=[0.145,0.647]$ ) and using the  
420 incongruent boat (10/19 vs 0/14;  $\theta \Delta(\text{route-heuristic}) \text{ HDI}=[0.068,0.600]$ ). This additional  
421 analysis confirmed that the route and heuristic groups diverged in the feature of temporal skill

422 learning. In addition, this group-distinguishing feature of skill-learning - temporal dynamics - was  
423 also the feature which separated the two groups' planning styles. In other words, by definition, the  
424 heuristic group did not incorporate temporal dynamics into their action selection, and uniquely  
425 showed no skill learning in this domain. Together with the above findings relating to their overall  
426 superiority in spatial skill, these findings suggest that a yoked dimensionality might exist between  
427 planning and skill. I.e., in complex states, the number of features relevant (or not) for action-  
428 selection policy may predict the number of features most likely to undergo learning (or not) during  
429 action execution.

430

## 431 **Discussion**

432

433 At least two schools of thought lend plausibility to the idea that humans might achieve optimal  
434 long-term ecological yields by basing goal-oriented decisions on subsets of information available  
435 in complex states. On the one hand, if either time or computational resources are restricted, humans  
436 might pragmatically trade off state-optimal parameterisation for reduced processing requirements  
437 (accuracy-resource trade-off). On the other hand, decisions informed by fewer dimensions are  
438 more robust to the influences of misleading stochastic noise (less-is-more principle). In either case,  
439 extant knowledge on decision heuristics stems predominantly from action-trivial tasks that obviate  
440 intrinsic motor proficiencies in determining choice outcomes. The present work directly addressed  
441 this shortcoming.

442

443 We developed a novel task requiring joint optimisation of action planning (selecting state-  
444 appropriate low-cost or high-cost cursors) and action execution (controlling cursors proficiently).  
445 Focusing first on action planning, cursor selection could be shaped by either exhaustive forward  
446 simulations, incorporating both spatial and temporal task dynamics, or a lower-dimension spatial  
447 heuristic strategy. Using a between-group DDM framework we successfully parsed a wide pool of  
448 human participants based on which strategy-specific planning difficulty best modulated their  
449 evidence-accumulation rates. Exploring the dynamics of each group's choice behaviour in greater  
450 detail, we revealed strong group-level Bayesian evidence supporting the model classifications.  
451 Participants allocated to the route group (forward simulations) were constrained by a higher  
452 decision criterion, consistent with the idea that they needed to incorporate a larger volume of  
453 information into their choices. This group also showed an enduring bias toward low-cost actions,  
454 revealed in both a DDM and logistic-choice context, and further demonstrated a more sluggish  
455 trajectory toward choice optimality.

456

457 We next juxtaposed these two groups, who were classified solely on the basis of action-selection  
458 RT, in the separate context of action execution. Specifically, we probed the relation between  
459 decision-heuristic adoption and intrinsic skill, measuring the latter in terms of reward yielded per  
460 trial, and in terms of additional independent skill dimensions of spatial and temporal precision. We  
461 again revealed strong Bayesian group differences; heuristic adoption aligned with higher reward  
462 yields underscored by better spatial skill with high-cost actions, even after correcting for the  
463 influence of selections in state. Together with the route group showing a parametric bias toward  
464 the low-cost cursor, we interpret the combined data across our task's action-execution contexts as  
465 unambiguously supporting heuristic adoption in higher-skilled systems.

466



467 These core findings extend the remit of the accuracy-resource trade-off and less-is-more models  
468 to include contexts involving non-trivial action. In a task requiring exquisite spatio-temporal  
469 control of selected actions, decision heuristics nonetheless aligned with swifter individual action  
470 selections, faster trajectories to choice optimality and, ultimately, better overall reward yields. The  
471 skill advantage in the heuristic group additionally dissociates our findings from predictions that  
472 integrate a compensatory role of heuristics with theories from the human motor literature. A core  
473 rationale of sensorimotor-based forward models of action selection is that efference copies and  
474 predicted sensorimotor costs provide improved efficiency and robustness in the face of noisy  
475 sensory-prediction errors<sup>27,28,29</sup>. A corollary is that a low-skill system will struggle to parameterise  
476 forward models, increasing computational requirements (accuracy-resource) and/or generating a  
477 high volume of online noise-driven corrective action (less-is-more)<sup>30,31</sup>. In either case, a heuristic-  
478 as-compensation model would predict that the low skill system is better served by adopting a  
479 simpler heuristic decision strategy.

480  
481 We observe that in a selection-execution context humans might not employ heuristics to  
482 compensate for higher intrinsic motor noise. Instead, planning dimensionality might align with  
483 progress along motor-learning trajectories previously observed in forced-choice contexts, (i.e., no  
484 selection required)<sup>13,14</sup>. Here, early in the acquisition of a novel motor skill, internal models that  
485 simulate action outcomes can expedite learning in exchange for high computational cost<sup>13</sup>. As  
486 participants then amass a wider cache of state transitions and successful experiences, control shifts  
487 from deliberative model-based planning to less taxing draws of state-appropriate motor outputs  
488 from memory<sup>13</sup>. Our findings are consistent with action selection following a similar qualitative  
489 trajectory at the cross-phenotypic level; participants with superior skill, i.e., farther along motor-  
490 learning trajectories, also used a less taxing policy to select actions.

491  
492 In computational terms, the core difference between our task and paradigms previously exploring  
493 heuristics is the source (internal vs external) of its generative model. Trial outcomes in our task  
494 were determined solely by a joint function that integrated participants' cursor selection and its  
495 subsequent execution. In other words, outcome variance was fully determined by parameters  
496 (decision and performance) generated intrinsically by participants. In contrast, forecasting and  
497 computerised emulations typically employ extrinsic generative models, where outcome variance  
498 is a function of parameters beyond participants' control. Recent evidence from bandit tasks (a  
499 computerised emulation with an extrinsic generative model) further suggests that humans might  
500 overparameterise their choices when extrinsic forces determine their fate, resulting in apparently  
501 irrational summary behaviour such as probability matching<sup>32</sup>. However, probability matching  
502 dissipates as a function of increased agency, for example, with increased motor involvement in  
503 choice execution<sup>32</sup>. While it is premature to conclude that increased agency will globally drive the  
504 adoption of heuristics, our findings nonetheless predict that a low-skill system (i.e., low agency)  
505 will more likely overparameterise choices in a selection-execution context, than revert to  
506 heuristics. This inverse-agency-parameterisation framework is also consistent with emerging  
507 associations in clinical computational work, where sequelae such as overthinking (in anxiety<sup>33</sup>)  
508 and rumination (in depression<sup>34</sup>) align with excess deliberative model-based learning<sup>35</sup>.

509  
510 We reveal additional evidence that planning dimensionality and skill might not simply evolve  
511 independently along separate strands of a learning manifold. In our task, common kinematic  
512 variables parameterised both action value and the motor proficiency of subsequent execution. We

513 were therefore able to probe how the depth of planning qualitatively aligned with the motor  
514 dimensions shaping both skill state and skill learning. As mentioned above, in terms of skill state,  
515 we first observed that the heuristic group's skill advantage was localised to the spatial dimension,  
516 with no overall group differences apparent in the temporal dimension. The heuristic group was  
517 therefore more skilled solely in the core feature of their decision policy. In a series of time-on-task  
518 analyses (skill learning) we additionally observed that the route group, employing the more  
519 granular planning, demonstrated skill learning across a broad array of motor-control features,  
520 including learning in temporal task dynamics. The heuristic group, in contrast, only showed skill  
521 learning in either the spatial or overall reward realms, i.e., no skill learning in the temporal domain  
522 (corroborated in a follow-up nonparametric analysis). Of note, a third nonplanner group, who  
523 never incorporated any state parameters into choice, and largely exploited the low-cost action,  
524 nonetheless improved across dimensions of motor-skill, including temporal skill (albeit only with  
525 the congruent cursor). In other words, the only group not showing credible plasticity in any  
526 temporal indices of skill learning was the heuristic group, i.e., the group who singularly used the  
527 spatial dimension of information when selecting actions.

528  
529 These combined findings support the idea that a yoked dimensionality might exist between plans  
530 governing the selection of actions and the skill shaping their subsequent execution. In terms of a  
531 bottom-up framework, the spatial dominance in the heuristic group's planning-policy and skill  
532 advantage suggests that such dimensional yoking may be modulated by skill-first credit  
533 assignment<sup>36</sup>. In other words, higher execution proficiency stemming predominantly from spatial  
534 precision may have overweighted this dimension during planning. Previous research has indeed  
535 shown that human choice policy can be separately influenced by distinct dimensions of error  
536 depending on the reliability of their signals<sup>37,38,39</sup>, and that increased agency might determine  
537 whether policy integrates either motor or reward-based errors<sup>10</sup>. A latter top-down framework is  
538 also supported by the apparent absence of temporal learning in the heuristic group. Note that the  
539 route and heuristic groups did not differ in terms of overall temporal skill, just that the heuristic  
540 group uniquely showed no time-on-task evolution in this domain. An intriguing implication of this  
541 pattern of results is that a controller that localises a cardinal subset of information for making state-  
542 appropriate action selections might itself be able to influence controllers of what it considers  
543 superfluous features of sensorimotor error.

544  
545 Future behavioural enquiry into heuristics could employ advancements on our selection-execution  
546 framework to investigate the yoked dimensionality hypothesis and investigate its potential bottom-  
547 up and top-down underpinnings in more detail. An additional key outstanding question relates to  
548 the robustness of heuristic adoption over time. Given the tendency for learning-related  
549 configurations in the human brain to vary more across phenotypes than at the intra-subject level<sup>40</sup>,  
550 we employed a between-groups analytic approach inspired by an increasing body of work that uses  
551 behavioural variance across the phenotype to increase robustness and reliability of hypothesis-  
552 specific brain activity<sup>24,41</sup>. While our DDM model parsimoniously distinguished human  
553 participants based on planning dimensionality, for power reasons, parameter estimations utilized  
554 all trials performed by participants. Our data therefore cannot inform any within-subject  
555 hypotheses regarding heuristic adoption; whether, for example, the route group would eventually  
556 reduce planning dimensionality with increased time-on-task. Though our logistic models revealed  
557 the route group's bias toward the low-cost cursor endured in later runs, suggesting their planning  
558 strategy may have held firm across the experiment, we cannot confirm whether they demonstrated

559 a robust phenotypic trait or a relatively slower evolution along a trajectory of policy formation  
560 mutually traversed by both them and the heuristic group.

561

## 562 **Conclusion**

563

564 The association between decision heuristics and intrinsic skill has evaded description due to the  
565 arbitrary nature of action in computerised goal-oriented tasks. Here we used a novel task emulating  
566 both the decisional and motoric demands of goal-oriented behaviour in a dynamic environment.  
567 DDM models parsimoniously identified human participants who adopted heuristics, and later  
568 modeling unambiguously aligned this lower-dimensional planning strategy with higher skill,  
569 consistent with an inverse-agency-parameterisation model. We additionally observe that  
570 phenotypic variance in the intricacy of planning potentially maps onto the granularity of  
571 improvement in motor ability. Advancements in the behavioural assays of actions selected and  
572 executed will hopefully uncover the underlying causality, learning dynamics and neural  
573 underpinnings giving rise to this possible yoked dimensionality.

574

## 575 **Materials and Methods**

576

### 577 *Participants and overview*

578 We report data from a multi-site experiment, with 53 right-handed human participants recruited in  
579 total, via both word-of-mouth and the online participant-recruitment portal at the University of  
580 California, Santa Barbara (UCSB). 34 participants reported as female and the group had an average  
581 (standard deviation) age of 21.9 (3.05) years. Participants performed the experiment either in a  
582 behavioural-testing suite (site 1, n=16) or an fMRI context (site 2, n=37). We report only  
583 behavioural data in the present paper from both groups. Visual angle subtended by stimuli was  
584 constant for the two testing sites and neither site differed in terms of eventual DDM group  
585 classifications (see Supplementary Materials: *Site-specific DDM group classifications*).  
586 Participant remuneration was \$10 (\$20, site 2) per hour baseline rate, with an additional \$10 (\$20,  
587 site 2) contingent on performance. Testing at both sites took place during a single session. The  
588 Institutional Review Board at UCSB approved all procedures. Prior to participating, participants  
589 provided informed written consent. All stimuli were presented using freely available functions<sup>42,43</sup>  
590 written in MATLAB code, and unless otherwise stated all analyses were also conducted using  
591 custom MATLAB scripts.

592

### 593 *Action selection-execution task: boatdock*

#### 594 *Paradigm*

595 Our task was a continuous, nonlinear adaptation of the discrete grid-sail task<sup>13</sup>, extended such that  
596 reward yields require joint optimisation of action selection and action execution. All visual stimuli  
597 appear on a screen with a gray background ( $RGB_{[0,1]}=[0.500,0.500,0.500]$ ). In each trial (Figure  
598 1a), they select one of two cursors, depicted by equilateral triangles (side length=0.830 °), to pilot  
599 from a start (S) to a goal (G), respectively depicted by a black ( $RGB_{[0,1]}=[0,0,0]$ ) and white  
600 ( $RGB_{[0,1]}=[1,1,1]$ ) square (side length=1.37 °). The SG pair appears within a circular grid  
601 (radius=3.82 °) centered on the screen center. Locations of the SG are drawn with uniform  
602 probability on each trial, constrained such that neither element falls within 0.320 ° of the grid  
603 perimeter, and their centres are at least 0.957 ° apart.

604

605 Each cursor displaces in three deterministic directions (Figure 1b.), mapping onto the same three  
606 separate response buttons ("throttles") operated by the right hand for the duration of the experiment  
607 (Figure 1c). One "congruent" cursor displaces at angles  $7\pi/6$  (index finger),  $\pi/2$  (middle finger),  
608 and  $11\pi/6$  (ring finger) in a reference frame where  $\pi/2$  aligns with the vertical meridian of the  
609 screen (Figure 1c). The other "incongruent" cursor displaces at angles  $5\pi/6$ ,  $\pi/6$  and  $3\pi/2$ , via one  
610 of two sets of spatially incongruent throttle-mappings, selected with uniform ( $p=0.500$ ) probability  
611 for each subject (an example mapping is in Figure 1c). For the entire experiment, the congruent  
612 and incongruent cursors are identified by a different color, green  $RGB_{[0,1]}=[0,1,0]$  and blue  
613  $RGB_{[0,1]}=[0,0,1]$ , determined with uniform ( $p=0.500$ ) probability before each participant's session.  
614

615 For every frame a single throttle is down, the cursor will accelerate in that direction (see  
616 Supplementary Materials for specific Acceleration dynamics) and a one unit of fuel is also  
617 subtracted from an allocation of 360 units provided for each trial. Participants therefore have a  
618 total 6 s throttle time on each trial before fuel depletes (refresh rate=60 Hz). Following a successful  
619 "dock" (see below) a screen informs participants of the fuel conserved, expressed as a proportion  
620 of the starting tank. No other exogenous cue is provided to participants regarding the size of the  
621 initial fuel allocation, or its rate of depletion.  
622

### 623 *Trial structure*

624 Each trial initiates with the action-selection period, signified by the appearance of an SG pair  
625 within a grid ("action selection", Figure 1a). Participants have no time limit to select their desired  
626 cursor with the middle or index finger of their left hand, respectively using "a" or "z" of a standard  
627 keyboard (site 1) or buttons 1 and 2 (i.e., the two most leftward) of a six-button bimanual response  
628 box<sup>44</sup> (site 2). Finger-cursor mapping (i.e., index→congruent, middle→incongruent, or vice versa)  
629 is determined every twenty trials by uniform ( $p=0.500$ ) probability, prompted throughout the  
630 action-selection period by a silhouette of a hand ( $9.49^\circ$ -by- $9.49^\circ$ ) below the grid, with the relevant  
631 cursor above the relevant finger. Once an action is selected, the action-execution period  
632 immediately begins, signified by the silhouette prompt disappearing and the selected cursor  
633 spawning at the centre of S ("trial start", Figure 1a). Participants now pilot the cursor from S to G  
634 with their right hand, using the "v" (index), "h" (middle) or "m" (ring) buttons on the keyboard  
635 (site 1) or buttons 4-6 on the right side of the response box (site 2). Action execution lasts until  
636 one of four possible trial outcomes. A successful "dock" is achieved if the cursor enters a  $0.479^\circ$ -  
637 radius circular threshold (not visible to participants) centred on the centre of G, at a velocity no  
638 greater than  $1.920^\circ/s$ . Alternatively, three catastrophic errors can occur if participants (i) run out  
639 of fuel, i.e., cumulative throttle time greater than 6 s; (ii) leave the grid; or (iii) enter the circular  
640 G threshold at a velocity greater than  $1.920^\circ/s$ . Once a trial outcome is achieved, a feedback screen  
641 immediately informs participants of the outcome, respectively, "WELL DONE!", "OUT OF  
642 GAS!", "LEFT THE GRID!" or "TOO FAST!", presented at the centre of the screen along with  
643 "SCORE: \$", where \$ is either the proportion of fuel preserved (for successful docks) or 0 for all  
644 catastrophic errors. The feedback remains on the screen for 1 s, followed by a blank grey inter-  
645 trial-interval screen lasting one, two or three seconds (determined on each trial with uniform  
646 probability  $p=0.333$ ). Participants performed 360 choice trials in total, portioned into six runs of  
647 60 trials. Interlaced between choice runs were 20 practice trials, on which scores do not count  
648 toward the final bonus, forcing ten trials with both the congruent and incongruent cursor in  
649 pseudorandom order.  
650

651 *Dependent variables*

652 To enumerate action values derived from route planning we first computed forward simulations of  
653 the optimal routes on each (simulation procedure described in Supplementary materials). We  
654 subtract the total frames spent accelerating during the optimal route ( $\lambda$ ) from the starting fuel bank  
655 of 360 units to estimate the maximum reward obtainable on a given trial. To enumerate action  
656 values derived from a simpler spatial heuristic we computed the angles (in  $^\circ$ ) between the vector  
657 of a trial's SG and each vector on the incongruent cursor. The vector creating the smallest angle  
658 (which we term the "offset") quantifies action value from this heuristic on a raw scale where values  
659 close to 0 reflect an SG perfectly aligning with one of the incongruent vectors and values close to  
660 60 reflect an SG perfectly aligning with one of the congruent vectors.

661  
662 We enumerated reaction time (RT) for action selection as the time elapsed between the time of the  
663 first frame of the action-selection screen (described above) and the time of cursor selection. We  
664 coded optimal selection as incongruent cursor on trials with  $\text{offset} < 30$  and congruent cursor on  
665 trials with  $\text{offset} > 30$  (optimal cursor selection did not differ depending on which action value  
666 (route vs heuristic) is computed).

667  
668 We enumerated skill performance on each trial in terms of reward, spatial action execution and  
669 temporal action execution. Reward was the amount of fuel conserved. All modeling of reward used  
670 raw units (i.e., on a scale of 0 to 360) to allow Gaussian likelihood functions, however for clarity  
671 in reported results we present findings as a proportion of the tank preserved (from 0 to 1). Spatial  
672 action execution was the number of direction changes, i.e., a count of how many times a different  
673 throttle was pressed relative to the one previous. Temporal action execution was the difference  
674 between the cursor's maximum velocity recorded during action-execution (in  $^\circ/\text{s}$ ), and the final  
675 velocity (in  $^\circ/\text{s}$ ) taken at the moment the cursor crossed the circular threshold around G, normalised  
676 by the distance covered by the SG (in  $^\circ$ ).

677  
678 *Data analysis*

679 *Computational modeling*

680 We modeled action planning leading up to cursor selection with variants of a standard drift-  
681 diffusion model<sup>45,46,47</sup>. The full models included five free parameters: high-difficulty drift rate  $\mu_1$ ,  
682 low-difficulty drift rate  $\mu_2$ , boundary  $B$ , starting point  $b_c B$ , and nondecision time  $t_0$ . The boundaries  
683 for congruent and incongruent choices were defined as  $B$  and  $-B$ , respectively. Hence a positive  
684  $b_c B$  relates to a congruency bias. Parameters were necessarily constrained as follows:  $0 \leq \mu_1 \leq \mu_2$ ,  
685  $\mu_2 \geq 0$ ,  $B > 0$ ,  $-1 < b_c B < 1$ , and  $t_0 > 0$ . Noise was represented as the standard deviation of diffusion  
686 with a fixed scaling parameter  $\sigma=0.1$ .

687  
688 We compared three types of models: two route-planning models (with one or two drift rates), two  
689 heuristic models (with one or two drift rates), and the null (i.e., nonplanning) model. For route-  
690 planning models, we determined difficulty by dividing trialwise differences in reward yields  
691 (between the simulated optimal routes for either cursor) into five bins. For the heuristic models,  
692 we determined difficulty by dividing trialwise offsets into five bins. The five difficulty bins  
693 corresponded to drift rates of  $-\mu_2$ ,  $-\mu_1$ ,  $0$ ,  $\mu_1$ , and  $\mu_2$ . We constrained single-drift-rate models such  
694 that  $\mu_1=\mu_2$  to minimise penalties for additional degrees of freedom, and the null model such that  
695  $\mu_1=\mu_2=0$  to represent insensitivity to the onscreen information.

696



697 We fitted candidate models to empirical distributions of choices and RTs at the level of individual  
698 subjects using maximum-likelihood estimation and the chi-square fitting method<sup>48</sup>. We calculated  
699 the frequencies of either choice and the 10, 30, 50, 70, and 90% quantiles (i.e., six bins) of their  
700 respective RT distributions for each difficulty level. We optimised free parameters with respect to  
701 overall goodness of fit for given subjects using iterations of the Nelder-Mead simplex algorithm  
702 with randomised seeding<sup>49</sup>. We adjusted for model complexity when comparing models that  
703 differed in degrees of freedom using the Akaike information criterion with correction for finite  
704 sample size (AICc)<sup>25,26</sup>.

705  
706 Three participant groups were defined by the results of model fitting following penalisation. The  
707 "route" and "heuristic" groups included those who were best fitted by a route-planning or heuristic  
708 model, respectively, according to the AICc. For assignment to the "nonplanner" group, adding free  
709 parameters for planning would not yield a significant improvement in goodness of fit relative to  
710 the null model without sensitivity to either route or heuristic information.

### 711 712 *Bayesian models*

713 We sampled all Bayesian posterior distributions using No U-Turn sampling (NUTS) Hamiltonian  
714 Monte Carlo, implemented with the PyMC3 package<sup>50</sup> in custom Python scripts. Unless otherwise  
715 specified, each model's posterior distributions were sampled across four chains of 10000 samples  
716 (40000 total), with an additional initial 10000 samples per chain (40000 total) discarded after  
717 tuning the sampler's step-size to an acceptance threshold of 0.95 (80000 samples combined), with  
718 further convergence criteria that no chains contain any divergences and no posterior's  $\hat{R}$  value,  
719 estimating the ratio of variance within the  $n=4$  chains to the variance of the pooled chains, greater  
720 than 1 (see:<sup>51</sup>). Unless otherwise stated, dependent variables were z-score normalised across  
721 participants prior to fits. We calculated minimum-width Bayesian credible intervals of relevant  
722 posteriors from their chains, using the default settings for Highest Density Interval (HDI)  
723 calculation in the arviz package<sup>52</sup>.

724  
725 A pair of models first estimated summaries of group-specific behaviour (reported in Table 1). A  
726 single Gaussian model first summarised continuous variables, accounting for eight variables in  
727 total. First, the four variables applicable to each group identified by the DDM framework,  
728 specifically: starting point -  $b_c B$ , boundary -  $B$ , and nondecision time -  $t_0$ , in addition to median  
729 RT. In addition, the three variables applicable only to the route and heuristic groups, specifically:  
730 drift rate, hi difficulty -  $\mu_1$ , drift rate, lo difficulty-  $\mu_2$  and sensitivity -  $S$ . This model assumed  
731 individual participant ( $n$ ) values ( $y$ ) for each variable ( $v$ ) were characterised by a separate Gaussian  
732 likelihood function, further depending on  $n$ 's group-allocation ( $g(n)$ : route, heuristic or  
733 nonplanner), i.e.,  $y_{n,v} \sim \mathcal{N}(M_{v,g(n)}, \Sigma_{v,g(n)})$ . Each variable was z-score normalised separately (but across  
734 all subjects) prior to fitting, and we respectively assigned each  $M_{v,g(n)}$  and  $\Sigma_{v,g(n)}$  an uninformed  
735 Gaussian and half-Gaussian prior:  $M_{v,g(n)} \sim \mathcal{N}(\mu=0, \sigma=10)$  and  $\Sigma_{v,g(n)} \sim \text{half}\mathcal{N}(\sigma=10)$ . Three separate  
736 binomial models then estimated summaries of behaviour as measured by three binomial variables  
737 that applied to all groups:  $p(\text{congruent cursor})$ ,  $p(\text{optimal cursor})$  and  $p(\text{catastrophic error})$ . For the  
738  $n(g)$  participants in each group ( $g$ ), each summary model used a Binomial likelihood function  
739  $y_g \sim \text{Bin}(\theta_g, t_g)$ , where  $y_g$  and  $t_g$  are  $n(g)$ -element vectors, respectively enumerating the number of  
740 observed instances reported by each individual participant in a group ( $y_g$ ) and their total number  
741 of trials ( $t_g$ ). In each model, we assigned each  $\theta_g$  an uninformed prior from the beta distribution:  
742  $\theta_g \sim \text{Beta}(\alpha=1, \beta=1)$ .

743

744 We used a hierarchical Bayesian binomial model to estimate the credible ranges of group-specific  
745 choice optimality (p(optimal cursor)), separately for each run. The hierarchical structure used  
746 Binomial likelihood functions to summarise the number of optimal cursor selections ( $y$ ) made by  
747 each participant ( $n$ ) for all trials ( $t$ ) in a given run ( $r$ ),  $y_{n,r} \sim \text{Bin}(\theta_{n,r}, t_{n,r})$ . The model constrained  $\theta_{n,r}$   
748 posteriors with separate hierarchical group ( $g(n)$ ) and run-specific Beta distributions, i.e.:  $\theta_{n,r} \sim$   
749  $\text{Beta}(\alpha_{g(n),r}, \beta_{g(n),r})$ . Each  $\alpha_{g(n),r}$  and  $\beta_{g(n),r}$  were assigned uninformed priors from a half-Student's T  
750 distribution, i.e.:  $\alpha_{g(n),r} \sim \text{HalfStudentT}(\sigma=10, \nu=10)$  and  $\beta_{g(n),r} \sim \text{HalfStudentT}(\sigma=10, \nu=10)$ ,  
751 bounded to never draw values of  $\alpha_{g(n),r}=0$  or  $\beta_{g(n),r}=0$ . Run-specific group-level deterministic  
752 posterior estimates of optimal choice ( $\theta_{g(n),r}$ ) were calculated by drawing 10,000 independent  
753 samples ( $k$ ) from relevant  $\alpha_{g(n),r}$  and  $\beta_{g(n),r}$  posteriors and computing the mean of the resulting  $k$ th  
754 Beta distribution, i.e.,  $\theta_{g(n),r,k} = \alpha_{g(n),r,k} / (\alpha_{g(n),r,k} + \beta_{g(n),r,k})$ .

755

756 We used two separate hierarchical Bayesian Gaussian models to estimate the credible ranges of  
757 group-mean performance in the two continuous action-execution variables (reward and temporal  
758 skill), separately for each run, and separately again for each cursor. In each model, the hierarchical  
759 structure used Gaussian likelihood functions to summarise each ( $n$ ) participant's trialwise measures  
760 across all trials in a given run ( $r$ ), separately for each cursor ( $c$ ), i.e.:  $y_{n,r,c} \sim \mathcal{N}(\mu_{n,r,c}, \exp(\sigma_{n,r,c}))$ . The  
761 model constrained  $\mu_{n,r,c}$  and  $\sigma_{n,r,c}$  posteriors with separate hierarchical group ( $g(n)$ ), run ( $r$ ) and  
762 choice-specific ( $c$ ) Gaussian distributions, i.e.:  $\mu_{n,r,c} \sim \mathcal{N}(M(\mu)_{g(n),r,c}, \Sigma(\mu)_{g(n),r,c})$  and  $\sigma_{n,r,c} \sim$   
763  $\mathcal{N}(M(\sigma)_{g(n),r,c}, \Sigma(\sigma)_{g(n),r,c})$ . Each  $M(\mu)_{g(n),r,c}$  and  $M(\sigma)_{g(n),r,c}$  were assigned uninformed Gaussian priors  
764 ( $\sim \mathcal{N}(\mu=0, \sigma=10)$ ), while each  $\Sigma(\mu)_{g(n),r,c}$  and  $\Sigma(\sigma)_{g(n),r,c}$  were assigned uninformed half-Gaussian  
765 priors ( $\sim \text{half}\mathcal{N}(\sigma=10)$ ). Note that the model for reward was fitted to a continuous measure, scoring  
766 fuel conserved on a scale of 0 to 360, but for clarity, we adjusted runwise and collapsed HDIs  
767 (division by 360), also prior to computing any HDIs related to between-comparisons, to express  
768 results as a proportion of fuel preserved. Time-on-task betas, however, relate to unadjusted  
769 posteriors.

770

771 We used a hierarchical Bayesian Poisson model to estimate the credible ranges of group-mean  
772 performance in spatial skill, separately for each run, and separately again for each cursor. In each  
773 model, the hierarchical structure used Poisson likelihood functions to summarise each ( $n$ )  
774 participant's trialwise direction changes across all trials in a given run ( $r$ ), separately for each cursor  
775 ( $c$ ), i.e.:  $y_{n,r,c} \sim \text{Pois}(\exp(\mu_{n,r,c}))$ . The model constrained  $\mu_{n,r,c}$  posteriors with separate hierarchical  
776 group ( $g(n)$ ), run ( $r$ ) and cursor-specific ( $c$ ) Gaussian distributions, i.e.:  $\mu_{n,r,c} \sim$   
777  $\mathcal{N}(M(\mu)_{g(n),r,c}, \Sigma(\mu)_{g(n),r,c})$ .  $M(\mu)_{g(n),r,c}$  and  $\Sigma(\mu)_{g(n),r,c}$  were respectively assigned uninformed Gaussian  
778 ( $\sim \mathcal{N}(\mu=0, \sigma=10)$ ) and half-Gaussian priors ( $\sim \text{half}\mathcal{N}(\sigma=10)$ ). For clarity in reported results, we re-  
779 adjusted runwise and collapsed HDIs (exponential transform), also prior to computing any HDIs  
780 related to between-comparisons, to discount the use of  $\exp(\mu_{n,r,c})$  in the likelihood function. Time-  
781 on-task betas, however, relate to unadjusted posteriors.

782

783 For both the hierarchical Gaussian and Poisson skill models, separately for each group ( $g$ ) and  
784 choice ( $c$ ), we enumerated deterministic posteriors of overall skill level by averaging each  
785 posterior sample across runs, i.e., for each posterior sample,  $M(\mu)_{g,c} = 1/6 \sum_{r=1}^6 M(\mu)_{g,r,c}$ . We then  
786 enumerated deterministic linear and logarithmic time-on-task effects  $b_{g,c}$  by drawing posterior  
787 samples from  $M(\mu)_{g,r,c}$ . Specifically, on each ( $k$ ) of 40,000 draws, we computed the  $k$ th column of

788  $b_{g,c}$  ( $b_{g,c,k}$ ), where  $b_{g,c,k}=(X^T X)^{-1} X^T Y_{g,c,k}$ . Here,  $Y_{g,c,k}$  is a six-element column vector containing an  
789 independent draw from each run ( $r$ ) of  $M(\mu)_{g,r,c}$  and matrix  $X$  is a three-column matrix respectively  
790 containing six constant terms (1), z-scored linear  $x \in (1, 2, \dots, 6)$  and z-scored logarithmic  
791  $x \in (\ln(1), \ln(2), \dots, \ln(6))$  regressors. The second and third rows of resulting 3-by-40,000 matrix  $b_{g,c}$   
792 respectively contained deterministic posteriors for linear and logarithmic time-on-task effects.  
793 Where logarithmic time-on-task effects were credible ( $0 \notin \text{HDI}$ ), we considered that group-cursor  
794 time-on-task effect to be logarithmic even if a linear effect was also observed. Note, as specified  
795 above, that in reported results, we present the HDIs of time-on-task coefficients (linear and  
796 logarithmic) fitted to unadjusted runwise posteriors, i.e., before we made any adjustment to  
797 posteriors for intuitive presentation of runwise/collapsed HDIs.

798  
799 For the individual-participant-level nonparametric analysis of temporal skill, we computed the  
800 median of each  $\mu_{n,r,c}$  posterior from the relevant Gaussian skill model. Separately for each cursor  
801 we regressed the six-element vector of participant's run-specific median values, first as a function  
802 of an intercept and a linear time-on-task regressor (z-scored linear  $x \in (1, 2, \dots, 6)$ ), and then as a  
803 function of an intercept and a z-scored logarithmic regressor  $x \in (\ln(1), \ln(2), \dots, \ln(6))$ . If either  
804 model's regressor ( $x$ ) was significant (determined by 95% coefficient confidence intervals not  
805 containing 0), we considered that participant time-on-task+ for that cursor and skill variable. We  
806 compared proportions of time-on-task+ participants ( $y$ ) between groups ( $g$ ), separately for each  
807 cursor, by fitting Binomial likelihood function  $y_g \sim \text{Binomial}(\theta_g, n_g)$ , assigning each  $\theta_g$  an  
808 uninformed prior from the beta distribution:  $\theta_g \sim \text{Beta}(\alpha=1, \beta=1)$ .

809  
810 In all above cases, we consider strong evidence of credible effects as follows: for comparison of  
811 parameters to criterion values (e.g., a regression coefficient above 0, or a likelihood above 0.50,  
812 etc.) we required the entire HDI of that parameter to not include the criterion value. For comparison  
813 of two parameters we required the HDI of the deterministic distribution of their difference  
814 (posterior A - posterior B) to not contain 0. Note that two HDIs might overlap, but that this  
815 deterministic distribution of difference may yet still not contain 0.

## 816 817 **Acknowledgements**

818 The research was supported by award #W911NF-16-1-0474 from the Army Research Office and  
819 by the Institute for Collaborative Biotechnologies under Cooperative Agreement W911NF-19-2-  
820 0026 with the Army Research Office.

## 821 822 **Competing interests**

823 Authors declare no financial, and no non-financial, competing interests.

## 824 825 **References**

- 826 1. Korn, C. W. & Bach, D. R. Minimizing threat via heuristic and optimal policies recruits  
827 hippocampus and medial prefrontal cortex. *Nat. Hum. Behav.* **3**, 733–745 (2019).
- 828 2. Gilovich, T., Griffin, D., Kahneman, D. & Cambridge University Press. *Heuristics and*  
829 *Biases: The Psychology of Intuitive Judgment*. (Cambridge University Press, 2002).
- 830 3. Gigerenzer, G. & Brighton, H. Homo heuristicus: why biased minds make better inferences.  
831 *Top. Cogn. Sci.* **1**, 107–143 (2009).
- 832 4. DeMiguel, V., Garlappi, L. & Uppal, R. Optimal versus Naive Diversification: How

- 833 Inefficient Is the 1/N Portfolio Strategy? *Heuristics*, 644–664 (2011).
- 834 5. Scheibehenne, B. & Bröder, A. Predicting Wimbledon 2005 Tennis Results by Mere Player  
835 Name Recognition. *Heuristics*, 613–623 (2011).
- 836 6. Richter, M., Gendolla, G. H., & Wright, R. A. Three Decades of Research on Motivational  
837 Intensity Theory: What We Have Learned About Effort and What We Still Don't Know. in  
838 *Advances in Motivation Science* **3**, 149–186 (2016).
- 839 7. Shadmehr, R., Huang, H. J. & Ahmed, A. A. A Representation of Effort in Decision-Making  
840 and Motor Control. *Curr. Biol.* **26**, 1929–1934 (2016).
- 841 8. Chapman, C. S. *et al.* Short-term motor plasticity revealed in a visuomotor decision-making  
842 task. *Behav. Brain Res.* **214**, 130–134 (2010).
- 843 9. Diquelou, M. C., Griffin, A. S. & Sol, D. The role of motor diversity in foraging innovations:  
844 a cross-species comparison in urban birds. *Behav. Ecol.* **27**, 584–591 (2016).
- 845 10. Parvin, D. E., McDougle, S. D., Taylor, J. A. & Ivry, R. B. Credit Assignment in a Motor  
846 Decision Making Task Is Influenced by Agency and Not Sensory Prediction Errors. *J.*  
847 *Neurosci.* **38**, 4521–4530 (2018).
- 848 11. Wolpert, D. M. & Landy, M. S. Motor control is decision-making. *Curr. Opin. Neurobiol.*  
849 **22**, 996–1003 (2012).
- 850 12. Haggard, P. Human volition: towards a neuroscience of will. *Nat. Rev. Neurosci.* **9**, 934–946  
851 (2008).
- 852 13. Fermin, A. S. R. *et al.* Model-based action planning involves cortico-cerebellar and basal  
853 ganglia networks. *Sci. Rep.* **6**, 1–14 (2016).
- 854 14. Korn, C. W. & Bach, D. R. Heuristic and optimal policy computations in the human brain  
855 during sequential decision-making. *Nat. Commun.* **9**, 325 (2018).
- 856 15. Usher, M. & McClelland, J. L. The time course of perceptual choice: the leaky, competing  
857 accumulator model. *Psychol. Rev.* **108**, 550–592 (2001).
- 858 16. Ratcliff, R. & McKoon, G. The diffusion decision model: theory and data for two-choice  
859 decision tasks. *Neural Comput.* **20**, 873–922 (2008).
- 860 17. Forstmann, B. U., Ratcliff, R. & Wagenmakers, E.-J. Sequential Sampling Models in  
861 Cognitive Neuroscience: Advantages, Applications, and Extensions. *Annu. Rev. Psychol.* **67**,  
862 641–666 (2016).
- 863 18. Peters, J. & D'Esposito, M. The drift diffusion model as the choice rule in inter-temporal and  
864 risky choice: A case study in medial orbitofrontal cortex lesion patients and controls. *PLoS*  
865 *Comput. Biol.* **16**, e1007615 (2020).
- 866 19. Shahar, N. *et al.* Improving the reliability of model-based decision-making estimates in the  
867 two-stage decision task with reaction-times and drift-diffusion modeling. *PLoS Comput. Biol.*  
868 **15**, e1006803 (2019).
- 869 20. Ballard, I. C. & McClure, S. M. Joint modeling of reaction times and choice improves  
870 parameter identifiability in reinforcement learning models. *J. Neurosci. Methods* **317**, 37–44  
871 (2019).
- 872 21. Colas, J. T. Value-based decision making via sequential sampling with hierarchical  
873 competition and attentional modulation. *PLoS One* **13**, e0203093 (2017).
- 874 22. Fontanesi, L., Gluth, S., Spektor, M. S. & Rieskamp, J. A reinforcement learning diffusion  
875 decision model for value-based decisions. *Psychon. Bull. Rev.* **26**, 1099–1121 (2019).
- 876 23. Pedersen, M. L., Frank, M. J. & Biele, G. The drift diffusion model as the choice rule in  
877 reinforcement learning. *Psychon. Bul. Rev.* **24**, 1234–1251 (2017).
- 878 24. Colas, J. T., Pauli, W. M., Larsen, T., Tyszka, J. M. & O'Doherty, J. P. Distinct prediction



- 879 errors in mesostriatal circuits of the human brain mediate learning about the values of both  
880 states and actions: evidence from high-resolution fMRI. *PLoS Comput. Biol.* **13**, e1005810  
881 (2017).
- 882 25. Akaike, H. A new look at the statistical model identification. *IEEE T. Automat. Contr.* **19**,  
883 716-723 (1974).
- 884 26. Hurvich, C. M. & Tsai, C.-L. Regression and time series model selection in small samples.  
885 *Biometrika* **76**, 297–307 (1989).
- 886 27. Miall, R. C. & Wolpert, D. M. Forward Models for Physiological Motor Control. *Neural*  
887 *Networks* **9**, 1265–1279 (1996).
- 888 28. Maruyama, S. *et al.* Cognitive control affects motor learning through local variations in  
889 GABA within the primary motor cortex. *Sci. Rep.* **11**, 18566 (2021).
- 890 29. Shadmehr, R., Smith, M. A. & Krakauer, J. W. Error correction, sensory prediction, and  
891 adaptation in motor control. *Annu. Rev. Neurosci.* **33**, 89–108 (2010).
- 892 30. Tunik, E., Houk, J. C. & Grafton, S. T. Basal ganglia contribution to the initiation of  
893 corrective submovements. *Neuroimage* **47**, 1757–1766 (2009).
- 894 31. Grafton, S. T. & Tunik, E. Human basal ganglia and the dynamic control of force during on-  
895 line corrections. *J. Neurosci.* **31**, 1600–1605 (2011).
- 896 32. Green, C. S., Benson, C., Kersten, D. & Schrater, P. Alterations in choice behavior by  
897 manipulations of world model. *P Natl Acad Sci USA.* **107**, 16401-16406 (2010).
- 898 33. Gagne, C., Dayan, P. & Bishop, S. J. When planning to survive goes wrong: predicting the  
899 future and replaying the past in anxiety and PTSD. *Curr. Opin. Behav. Sci.* **24**, 89–95 (2018).
- 900 34. Huys, Q. J. M., Daw, N. D. & Dayan, P. Depression: a decision-theoretic analysis. *Annu.*  
901 *Rev. Neurosci.* **38**, 1–23 (2015).
- 902 35. Hunter, L. E., Meer, E. A., Gillan, C. M., Hsu, M. & Daw, N. D. Increased and biased  
903 deliberation in social anxiety. *Nat Hum Behav.* **6**, 146–154 (2022).
- 904 36. McDougle, S. D. *et al.* Credit assignment in movement-dependent reinforcement learning.  
905 *Proc. Natl. Acad. Sci. U. S. A.* **113**, 6797–6802 (2016).
- 906 37. Daw, N. D., Niv, Y. & Dayan, P. Uncertainty-based competition between prefrontal and  
907 dorsolateral striatal systems for behavioral control. *Nat. Neurosci.* **8**, 1704–1711 (2005).
- 908 38. Lee, S. W., Shimojo, S. & O’Doherty, J. P. Neural computations underlying arbitration  
909 between model-based and model-free learning. *Neuron* **81**, 687–699 (2014). *Proc. Natl.*  
910 *Acad. Sci. U. S. A.* **113**, 6797–6802 (2016).
- 911 39. O’Doherty, J. P. *et al.* Why and how the brain weights contributions from a mixture of  
912 experts. *Neurosci. Biobehav. Rev.* **123**, 14–23 (2021).
- 913 40. Bassett, D. S. *et al.* Dynamic reconfiguration of human brain networks during learning. *Proc.*  
914 *Natl. Acad. Sci. U. S. A.* **108**, 7641–7646 (2011).
- 915 41. Schönberg, T., Daw, N. D., Joel, D. & O’Doherty, J. P. Reinforcement learning signals in the  
916 human striatum distinguish learners from nonlearners during reward-based decision making.  
917 *J. Neurosci.* **27**, 12860–12867 (2007).
- 918 42. Brainard, D. H. The Psychophysics Toolbox. *Spatial Vision* **10**, 433-436 (1997).
- 919 43. Pelli, D. G. The VideoToolbox software for visual psychophysics: Transforming numbers  
920 into movies. *Spatial Vision* **10**, 437-442 (1997).
- 921 44. Current Designs Incorporated. Philadelphia, PA.
- 922 45. Stone, M. Models for choice-reaction time. *Psychometrika* **25**, 251-260 (1960).
- 923 46. Laming, D. R. J. *Information theory of choice-reaction times.* (Academic Press, Oxford,  
924 United Kingdom. 1968).



- 925 47. Ratcliff, R. A theory of memory retrieval. *Psychol. Rev.* **85**, 59-108 (1978).  
 926 48. Ratcliff, R., & Tuerlinckx, F. Estimating parameters of the diffusion model: approaches to  
 927 dealing with contaminant reaction times and parameter variability. *Psychon. B. Rev.* **9**,  
 928 438-481 (2002).  
 929 49. Nelder, J. A., & Mead, R. A simplex method for function minimization. *Comput. J.* **7**,  
 930 308-313 (1965).  
 931 50. Salvatier, J., Wiecki, T. V. & Fonnesbeck, C. Probabilistic programming in Python using  
 932 PyMC3. *PeerJ Computer Science* **2**, e55 (2016).  
 933 51. Vehtari, A., Gelman, A., Simpson, D., Carpenter, B. & Bürkner, P. C. Rank-normalization,  
 934 folding, and localization: An improved  $\widehat{R}$  for assessing convergence of  
 935 MCMC. *Bayesian Analysis* **16**, 667–718 (2021).  
 936 52. Kumar, R., Carroll, C., Hartikainen, A. & Martin, O. ArviZ a unified library for exploratory  
 937 analysis of Bayesian models in Python. *J. Open Source Softw.* **4**, 1143 (2019).

938  
 939 **Supplementary materials**

940  
 941 *Nonplanner group*

942 In addition to the 33 participants identified by our DDM framework as likely employing one of  
 943 two planning strategies, 20 participants were best fitted by the null model (skill variables of this  
 944 group are included in Supplementary Table 1). While our hypotheses principally focused on  
 945 parametric and skill differences between the two classes of planners (route and heuristic), we  
 946 briefly comment here on the nonplanner group. Of all groups, nonplanners showed the fastest  
 947 overall decision time and strongest DDM bias toward the congruent cursor (Table 1), consistent  
 948 with an action-selection policy that did not integrate the external state. However, despite  
 949 demonstrating no evidence of state-appropriate action selection (Figure 3b.), largely stemming  
 950 from an over-reliance on the congruent cursor (Table 1), nonplanners nonetheless exhibited skill  
 951 learning during the execution portion of our task (Figure 3a). They improved with both cursors in  
 952 terms of reward yield and spatial precision, but only demonstrated improved temporal dynamics  
 953 with the congruent cursor, i.e., the cursor they exploited to yield reward.

954  
 955 **Supplementary Table 1:** group-by-run skill measure  $\mu$  HDI, HDIs collapsed  
 956 across runs and HDIs of time-on-task effects  
 957

| cursor/variable   | HDI            | non           | route          | heur           |
|-------------------|----------------|---------------|----------------|----------------|
| p(optimal choice) | $\theta$ run 1 | [0.279,0.658] | [0.354,0.760]  | [0.366,0.823]  |
|                   | $\theta$ run 2 | [0.307,0.681] | [0.433,0.830]  | [0.501,0.898]+ |
|                   | $\theta$ run 3 | [0.306,0.689] | [0.469,0.848]  | [0.514,0.893]+ |
|                   | $\theta$ run 4 | [0.299,0.667] | [0.533,0.882]+ | [0.543,0.906]+ |
|                   | $\theta$ run 5 | [0.297,0.668] | [0.555,0.887]+ | [0.557,0.908]+ |
|                   | $\theta$ run 6 | [0.321,0.696] | [0.536,0.885]+ | [0.560,0.938]+ |

|                           |                     |                  |                  |                  |
|---------------------------|---------------------|------------------|------------------|------------------|
| cong/reward               | mu run 1            | [0.415,0.468]    | [0.463,0.515]    | [0.430,0.532]    |
|                           | mu run 2            | [0.442,0.488]    | [0.504,0.557]    | [0.484,0.580]    |
|                           | mu run 3            | [0.495,0.538]    | [0.535,0.603]    | [0.535,0.613]    |
|                           | mu run 4            | [0.484,0.530]    | [0.528,0.608]    | [0.533,0.608]    |
|                           | mu run 5            | [0.496,0.535]    | [0.550,0.614]    | [0.537,0.598]    |
|                           | mu run 6            | [0.504,0.554]    | [0.562,0.619]    | [0.543,0.610]    |
|                           | mu (runs coll)      | [0.487,0.505]    | [0.542,0.567]    | [0.533,0.566]    |
|                           | $\beta(\text{run})$ | [0.091,0.191]*   | [0.103,0.218]*   | [0.058,0.230]*   |
| $\beta(\log(\text{run}))$ | [0.004,0.397]*      | [-0.003,0.480]   | [-0.004,0.714]   |                  |
| incong/reward             | mu run 1            | [0.338,0.410]    | [0.369,0.449]    | [0.425,0.537]    |
|                           | mu run 2            | [0.375,0.462]    | [0.450,0.532]    | [0.461,0.568]    |
|                           | mu run 3            | [0.412,0.493]    | [0.491,0.584]    | [0.549,0.615]    |
|                           | mu run 4            | [0.446,0.510]    | [0.519,0.584]    | [0.528,0.608]    |
|                           | mu run 5            | [0.439,0.499]    | [0.519,0.598]    | [0.534,0.600]    |
|                           | mu run 6            | [0.437,0.533]    | [0.515,0.601]    | [0.536,0.690]    |
|                           | mu (runs coll)      | [0.431,0.462]    | [0.500,0.534]    | [0.530,0.565]    |
|                           | $\beta(\text{run})$ | [0.101,0.268]*   | [0.146,0.308]*   | [0.055,0.243]*   |
| $\beta(\log(\text{run}))$ | [-0.042,0.599]      | [0.236,0.897]*   | [0.008,0.763]*   |                  |
| cong/spatial              | mu run 1            | [2.497,3.043]    | [1.817,2.277]    | [1.696,2.651]    |
|                           | mu run 2            | [2.237,2.614]    | [1.470,1.956]    | [1.284,2.000]    |
|                           | mu run 3            | [1.891,2.264]    | [1.271,1.728]    | [1.151,1.766]    |
|                           | mu run 4            | [1.939,2.335]    | [1.218,1.657]    | [1.092,1.605]    |
|                           | mu run 5            | [1.844,2.208]    | [1.178,1.523]    | [1.171,1.690]    |
|                           | mu run 6            | [1.687,2.098]    | [1.082,1.428]    | [1.153,1.640]    |
|                           | mu (runs coll)      | [2.114,2.279]    | [1.433,1.605]    | [1.406,1.656]    |
|                           | $\beta(\text{run})$ | [-0.156,-0.076]* | [-0.211,-0.105]* | [-0.212,-0.048]* |
| $\beta(\log(\text{run}))$ | [-0.303,0.007]      | [-0.378,0.054]   | [-0.703,-0.024]* |                  |

|                           |                     |                  |                  |                  |
|---------------------------|---------------------|------------------|------------------|------------------|
| incong/spatial            | mu run 1            | [3.053,3.736]    | [2.438,3.190]    | [1.702,2.686]    |
|                           | mu run 2            | [2.354,3.380]    | [1.650,2.323]    | [1.324,2.106]    |
|                           | mu run 3            | [2.018,2.782]    | [1.384,1.916]    | [1.143,1.696]    |
|                           | mu run 4            | [2.123,2.748]    | [1.265,1.706]    | [1.174,1.766]    |
|                           | mu run 5            | [2.130,2.804]    | [1.287,1.713]    | [1.220,1.726]    |
|                           | mu run 6            | [1.895,2.654]    | [1.380,1.791]    | [1.204,1.893]    |
|                           | mu (runs coll)      | [2.439,2.748]    | [1.662,1.874]    | [1.452,1.726]    |
|                           | $\beta(\text{run})$ | [-0.180,-0.063]* | [-0.241,-0.128]* | [-0.195,-0.015]* |
| $\beta(\log(\text{run}))$ | [-0.458,-0.008]*    | [-0.728,-0.262]* | [-0.744,-0.035]* |                  |
| cong/temporal             | mu run 1            | [0.650,0.736]    | [0.579,0.688]    | [0.598,0.712]    |
|                           | mu run 2            | [0.619,0.692]    | [0.609,0.711]    | [0.555,0.700]    |
|                           | mu run 3            | [0.640,0.721]    | [0.628,0.738]    | [0.571,0.733]    |
|                           | mu run 4            | [0.674,0.749]    | [0.643,0.743]    | [0.610,0.761]    |
|                           | mu run 5            | [0.688,0.757]    | [0.659,0.793]    | [0.637,0.776]    |
|                           | mu run 6            | [0.710,0.768]    | [0.665,0.787]    | [0.621,0.784]    |
|                           | mu (runs coll)      | [0.685,0.716]    | [0.667,0.712]    | [0.641,0.700]    |
|                           | $\beta(\text{run})$ | [0.027 0.133]*   | [0.043 0.205]*   | [-0.018,0.187]   |
| $\beta(\log(\text{run}))$ | [-0.411,0.034]      | [-0.250,0.385]   | [-0.530,0.279]   |                  |
| incong/temporal           | mu run 1            | [0.623,0.819]    | [0.565,0.676]    | [0.638,0.798]    |
|                           | mu run 2            | [0.660,0.787]    | [0.612,0.713]    | [0.647,0.780]    |
|                           | mu run 3            | [0.630,0.757]    | [0.601,0.701]    | [0.612,0.750]    |
|                           | mu run 4            | [0.686,0.848]    | [0.612,0.741]    | [0.611,0.751]    |
|                           | mu run 5            | [0.697,0.835]    | [0.630,0.763]    | [0.638,0.811]    |
|                           | mu run 6            | [0.750,0.862]    | [0.689,0.814]    | [0.660,0.783]    |
|                           | mu (runs coll)      | [0.716,0.776]    | [0.654,0.701]    | [0.678,0.737]    |
|                           | $\beta(\text{run})$ | [-0.004,0.219]   | [0.048,0.217]*   | [-0.096,0.114]   |
| $\beta(\log(\text{run}))$ | [-0.657,0.270]      | [-0.389,0.256]   | [-0.592,0.232]   |                  |

959 *Notes: non=nonplanner; heur=heuristic; cong=congruent cursor; incong=incongruent cursor;*  
960 *spatial=spatial skill; temporal=temporal skill; coll.=collapsed across runs; runwise and*  
961 *collapsed HDIs for reward have been re-adjusted (division by 360) to express reward as a*  
962 *proportion of fuel preserved; \*=time-on-task coefficient credibly dearts 0;+ proportion of choices*  
963 *credibly above chance optimality (0.50).*

964

### 965 *Hierarchical logistic choice model*

966 We used a hierarchical Bayesian logistic regression model to assess the group-specific modulation  
967 of choice (p(incongruent)) as a function of an intercept ( $\beta_0$ ), trial offsets ( $\beta_1$ ; i.e., the trialwise  
968 enumeration of heuristic value) and the Euclidean distance (in screen pixels) of trial SGs ( $\beta_2$ ). The  
969 hierarchical structure used Bernoulli likelihood functions to characterise choice likelihood for each  
970 individual participant (n) and trial (t), i.e.:  $y_{n,t} \sim \text{Bernoulli}(p_{n,t})$ , where  $p_{n,t}$  is computed with a  
971 deterministic logistic transition function  $S(x_{n,t})$ , where  $x_{n,t} = \beta_0 + \beta_1 * \text{offset}_{n,t} + \beta_2 * \text{distance}_{n,t}$ . The  
972 model constrained coefficient posteriors fitted to each participant's set of trials with separate  
973 hierarchical group-specific (g(n)) Gaussian distributions, i.e.:  $\beta_0_n \sim \mathcal{N}(M(\beta_0)_{g(n)}, \Sigma(\beta_0)_{g(n)})$ ,  $\beta_1_n \sim$   
974  $\mathcal{N}(M(\beta_1)_{g(n)}, \Sigma(\beta_1)_{g(n)})$  and  $\beta_2_n \sim \mathcal{N}(M(\beta_2)_{g(n)}, \Sigma(\beta_2)_{g(n)})$ . Each  $M(\beta_0)_{g(n)}$ ,  $M(\beta_1)_{g(n)}$  and  $M(\beta_2)_{g(n)}$   
975 were assigned uninformed Gaussian priors ( $\sim \mathcal{N}(\mu=0, \sigma=10)$ ), while each  $\Sigma(\beta_0)_{g(n)}$ ,  $\Sigma(\beta_1)_{g(n)}$  and  
976  $\Sigma(\beta_2)_{g(n)}$  were assigned uninformed half-Gaussian priors ( $\sim \text{half}\mathcal{N}(\sigma=10)$ ). Both regressors were z-  
977 score normalised across all trials from all subjects prior to fitting. Finally, we fitted two iterations  
978 of this model, one using trials from the early phase of the task (first three runs), and a second using  
979 trials from the late phase of the task (final three runs).

980

981 Results of this hierarchical logistic regression model are summarised below in Supplementary  
982 Table 2. This model first bolstered the DDM by demonstrating the route and heuristic group  
983 uniquely integrated state information into action selection. During both early and late phases of  
984 the task, the route ( $\beta_{1_{\text{route}}}$   $\mu$  HDI early=[-0.865,-0.483];  $\beta_{1_{\text{route}}}$   $\mu$  HDI late=[-1.559,-1.014]) and  
985 heuristic group ( $\beta_{1_{\text{heuristic}}}$   $\mu$  HDI early=[-1.466,-0.601];  $\beta_{0_{\text{heuristic}}}$   $\mu$  HDI late=[-2.080,-1.201]),  
986 incorporated route offsets optimally into choice; note that their credibly negative coefficient HDIs  
987 reflect increased likelihood of selecting the incongruent cursor when offset angle was low, i.e.,  
988 suited to the incongruent cursor (offset was normalised to vectors on the incongruent cursor; see:  
989 Methods - Dependent variables). In addition, this model supported the finding from the DDM  
990 relating to the route group's bias. The route group uniquely showed a bias to the congruent cursor  
991 in both early and late phases of the task, ( $\beta_{0_{\text{route}}}$   $\mu$  HDI early=[-0.682,-0.240];  $\beta_{0_{\text{route}}}$   $\mu$  HDI  
992 late=[-0.423,-0.104]), which was not credibly evident in the heuristic group in either instance  
993 ( $\beta_{0_{\text{heuristic}}}$   $\mu$  HDI early=[-0.480,0.011];  $\beta_{0_{\text{heuristic}}}$   $\mu$  HDI late=[-0.401,0.073]). No groups credibly  
994 modulated their choice by the distance covered by a route's start-goal pairing (SG), in either early  
995 or late phases of the task (all HDIs for  $\beta_2$  subtend 0 in Supplementary Table 2). However, of note,  
996 the trending positive distance parameter estimate for the route group in the early phase suggests  
997 first that their planning strategy was not born out of risk-aversion, (which instead would have been  
998 characterised by incongruent selection on shorter SGs). Though we can only speculate on a non-  
999 credible finding, if the route group selectively used the high-cost incongruent cursor early in  
1000 primarily longer SGs, they may have been reserving its usage for situations where optimal choice  
1001 was disproportionately beneficial, due to the nonlinear temporal task physics (Figure 1d, Results:  
1002 *Forward simulations vs heuristics*, Figure 2d).

1003

1004  
1005  
1006

**Supplementary Table 2:** Hierarchical logistic model of choice behaviour parameters

| task phase | parameter               | non              | route            | heur             |
|------------|-------------------------|------------------|------------------|------------------|
| early      | $\beta_0$ (int.) mu     | [-1.690,-0.780]* | [-0.682,-0.240]* | [-0.480,0.011]   |
| late       | $\beta_0$ (int.) mu     | [-1.471,-0.672]* | [-0.423,-0.104]* | [-0.401,0.073]   |
| early      | $\beta_1$ (offset) mu   | [0.016,0.196]*   | [-0.865,-0.483]* | [-1.466,-0.601]* |
| late       | $\beta_1$ (offset) mu   | [-0.059,0.172]   | [-1.559,-1.014]* | [-2.080,-1.201]* |
| early      | $\beta_2$ (distance) mu | [-0.092,0.100]   | [-0.015,0.136]   | [-0.175,0.045]   |
| late       | $\beta_2$ (distance) mu | [-0.127,0.071]   | [-0.083,0.087]   | [-0.112,0.123]   |

1007  
1008  
1009

Notes: non=nonplanner; heur=heuristic; int.=intercept; \*=coefficient credibly dearts 0;

1010

*Hierarchical Poisson model with choice-normalised spatial skill*

1011  
1012  
1013  
1014  
1015  
1016  
1017  
1018  
1019  
1020  
1021  
1022  
1023  
1024  
1025  
1026  
1027  
1028  
1029  
1030  
1031  
1032  
1033

To dissociate the heuristic group's superior spatial skill with the incongruent cursor from their overall more optimal choice behaviour, we used a hierarchical Bayesian Poisson model to estimate the credible ranges of group-mean performance in spatial skill, using a measure which had been normalised by the optimal number of direction changes in the simulated solution (see Supplementary Materials: *Optimal route simulations*). This normalisation took the number of direction changes made on each trial, and subtracted from that the number of direction changes made by the optimal solution for the specific cursor chosen on that trial (i.e., not necessarily normalised to the optimal cursor for a given route, but the selected cursor). Due to a small number of resulting trials (0.3%, across all subjects) containing a negative value (never lower than -1), we added a constant (1) to all trials, to ensure the lowest value was 0, suitable for a Poisson likelihood function. With this normalisation, higher values reflect worse spatial skill, i.e., more direction changes relative to cursor-optimal. As with the unnormalised model, we fitted the model separately for each run, and separately again for each cursor. In each model, the hierarchical structure used Poisson likelihood functions to summarise each (n) participant's trialwise direction changes across all trials in a given run (r), separately for each cursor (c), i.e.:  $y_{n,r,c} \sim \text{Pois}(\exp(\mu_{n,r,c}))$ . The model constrained  $\mu_{n,r,c}$  posteriors with separate hierarchical group (g(n)), run (r) and cursor-specific (c) Gaussian distributions, i.e.:  $\mu_{n,r,c} \sim \mathcal{N}(\mathbf{M}(\mu)_{g(n),r,c}, \Sigma(\mu)_{g(n),r,c})$ .  $\mathbf{M}(\mu)_{g(n),r,c}$  and  $\Sigma(\mu)_{g(n),r,c}$  were respectively assigned uninformed Gaussian ( $\sim \mathcal{N}(\mu=0, \sigma=10)$ ) and half-Gaussian priors ( $\sim \text{half}\mathcal{N}(\sigma=10)$ ). For clarity in reported results, we re-adjusted runwise and collapsed HDIs (exponential transform, followed by subtraction of -1), also prior to computing any HDIs related to between-comparisons, to discount first the use of  $\exp(\mu_{n,r,c})$  in the likelihood function, and then the constant added to all trials prior to fitting. Time-on-task betas, however, relate to unadjusted posteriors.

1034  
1035  
1036  
1037

Results of this model are summarised below in Supplementary Table 3. Crucially, collapsing across runs, we see the heuristic group demonstrating credibly fewer direction changes with the incongruent cursor ( $\mu \Delta(\text{route-heuristic}) \text{ HDI}=[0.005,0.331]$ ), supporting the interpretation of



1038 the finding from the main paper (see: Results - *Comparisons of skill between route and heuristic*  
 1039 *groups*) that their superior incongruent spatial skill is independent to the navigational  
 1040 consequences of their choices.

1041  
 1042  
 1043  
 1044

**Supplementary Table 3:** group-by-run spatial skill, normalised by cursor selection

| cursor/skill       | HDI             | non              | route            | heur             |
|--------------------|-----------------|------------------|------------------|------------------|
| cong/spatial       | mu run 1        | [1.664,2.216]    | [1.085,1.522]    | [1.000,1.886]    |
|                    | mu run 2        | [1.408,1.776]    | [0.742,1.195]    | [0.610,1.228]    |
|                    | mu run 3        | [1.092,1.430]    | [0.555,0.972]    | [0.481,1.046]    |
|                    | mu run 4        | [1.073,1.479]    | [0.519,0.891]    | [0.422,0.872]    |
|                    | mu run 5        | [0.982,1.323]    | [0.464,0.758]    | [0.477,0.889]    |
|                    | mu run 6        | [0.879,1.261]    | [0.363,0.669]    | [0.432,0.861]    |
|                    | mu (runs coll.) | [1.276,1.436]    | [0.707,0.861]    | [0.704,0.926]    |
|                    | $\beta$ (run)   | [-0.148,-0.076]* | [-0.173,-0.092]* | [-0.178,-0.052]* |
| $\beta$ (log(run)) | [-0.282,0.000]  | [-0.308,0.029]   | [-0.546,-0.016]* |                  |
| incong/spatial     | mu run 1        | [2.190,2.912]    | [1.664,2.408]    | [0.912,1.875]    |
|                    | mu run 2        | [1.568,2.593]    | [0.943,1.578]    | [0.629,1.347]    |
|                    | mu run 3        | [1.166,1.924]    | [0.674,1.160]    | [0.456,0.978]    |
|                    | mu run 4        | [1.266,1.915]    | [0.640,1.018]    | [0.534,1.100]    |
|                    | mu run 5        | [1.217,1.918]    | [0.594,0.966]    | [0.516,1.002]    |
|                    | mu run 6        | [1.032,1.782]    | [0.611,0.994]    | [0.489,1.113]    |
|                    | mu (runs coll.) | [1.586,1.901]    | [0.953,1.150]    | [0.749,1.007]    |
|                    | $\beta$ (run)   | [-0.178,-0.066]* | [-0.210,-0.115]* | [-0.157,-0.008]* |
| $\beta$ (log(run)) | [-0.421,0.007]  | [-0.573,-0.185]* | [-0.567,0.022]   |                  |

1045  
 1046 *Notes: non=nonplanner; heur=heuristic; cong=congruent cursor; incong=incongruent cursor;*  
 1047 *spatial=cursor-normalised spatial skill; coll.=collapsed across runs; runwise and collapsed HDIs*  
 1048 *have been re-adjusted (subtraction of -1) to discount the constant added to all trials prior to fitting;*  
 1049 *\*=time-on-task coefficient credibly departs 0.*

1050  
 1051 *Site-specific DDM group classifications*  
 1052 To test group allocations from the DDM for each site, we fitted a summary Bayesian multinomial  
 1053 model. The model used a k=3 multinomial likelihood function to characterise the counts (#) for

1054 each group classification  $y=[\#(\text{route}) \#(\text{heuristic}) \#(\text{nonplanner})]$ , separately for the participants  
 1055 ( $n_s$ ) each site ( $s$ )  $y_s \sim \text{Multinomial}(\Theta_s, n_s)$ . We assigned  $\Theta_s$  an uninformed prior from a Dirichlet  
 1056 distribution  $\Theta_s \sim \text{Dirichlet}(\alpha=[1,1,1])$ . Results from this model (summarised in Supplementary  
 1057 Table 3 below) confirmed the DDM ascribed similar group allocations for both testing sites.

1058  
 1059 **Supplementary Table 4: site-specific DDM group allocations**  
 1060

| parameter              | HDI (site 1)  | HDI (site 2)  |
|------------------------|---------------|---------------|
| $\Theta$ p(route)      | [0.167,0.569] | [0.213,0.493] |
| $\Theta$ p(heuristic)  | [0.054,0.386] | [0.164,0.435] |
| $\Theta$ p(nonplanner) | [0.220,0.633] | [0.215,0.492] |

1061  
 1062 *Acceleration dynamics*  
 1063 At a resolution of 60 Hz, cursor position during action execution is updated for each frame  $f$  by  
 1064 adding a two-element vector ( $\mathbb{D}$ ) to the cursor's position at frame  $f-1$ .  $\mathbb{D}$  is computed using  $D =$   
 1065  $\sum_{v=1}^3 \mathbb{P}_v * \mathbb{V}(v)$ . Here,  $\mathbb{P}_v$  is the two-element vector ( $x,y$ ) in screen coordinates describing a  
 1066 Euclidean displacement of  $0.320^\circ$  in the direction of a given throttle ( $v$ ).  $\mathbb{V}(v)$  scales each  
 1067 coordinate in  $\mathbb{P}_v$  in accordance with nonlinear acceleration by using  $\mathbb{V}(v) = f(\mathbb{T}(v))$ .  
 1068 Where  $f(x) = -0.011x^3 + 0.167x^2$ . For every frame a given throttle ( $v$ ) is down, the relevant  
 1069 element of three-element vector  $\mathbb{T}$  (i.e.,  $\mathbb{T}(v)$ ) increases by 0.017 s, and for every frame a throttle  
 1070 is released,  $\mathbb{T}(v)$  decreases by 0.017 s until it reaches 0. Elements of  $\mathbb{T}$  therefore update separately  
 1071 and gradually at this fixed rate, meaning non-zero momentum from one vector can continue  
 1072 influencing the displacement of the cursor after its release and while another throttle is down,  
 1073 allowing curvilinear two-dimensional displacement (see top panel of Figure 1f). However, if more  
 1074 than one throttle is down for a given frame, each element of  $\mathbb{T}$  decreases by 0.017 s (unless already  
 1075 at 0), precluding participants from using simultaneous throttle pulsing to create additional  
 1076 displacement angles outside of the six afforded across the two cursors.

1077  
 1078 *Optimal route simulations*  
 1079 To enumerate action values derived from route planning we first computed forward simulations of  
 1080 the optimal routes (i.e., with the highest reward yield) from S to G for each cursor on each trial.  
 1081 Separately for each cursor, we first assessed whether the SG on each trial afforded a single linear  
 1082 displacement with one of its vectors from S that would intersect the circular threshold around G  
 1083 (point of intersection= $G^*$ ). If a cursor satisfied this requirement we computed the optimal throttle  
 1084 sequence with that vector as a single pulse of length  $t_{\text{opt}}$  that accelerated the cursor to a maximum  
 1085 speed at half the distance between S and  $G^*$ , followed by a release of the throttle to allow the  
 1086 cursor's momentum to bring it to  $G^*$ , arriving at a velocity of 0.  $t_{\text{opt}}$  is estimated to the precision of  
 1087 our (60 Hz) screen resolution by finding the lowest number of frames ( $\lambda$ ), such that:  $\sum_0^\lambda D_\lambda^* > D/2$ ,  
 1088 where  $D$  is the Euclidean distance between S and  $G^*$  in screen coordinates and  $D_\lambda^* =$   
 1089  $\sqrt{SS(\mathbb{P}_v * f(\lambda * 0.017))}$ , where  $SS$  denotes sum of squares and  $f(x)$  and  $\mathbb{P}_v$  are from the above  
 1090 section describing task physics. Expressing optimal pulse length ( $t_{\text{opt}}$ ) in frames ( $\lambda$ ) automatically  
 1091 computes the number of units of fuel depleted by this optimal sequence. We subtract  $\lambda$  from 360  
 1092 as our final estimate of the reward obtainable from the optimal route. (Note that we leave this score

1093 on a scale of 0 to 360 for modeling purposes, but present score feedback to participants on each  
1094 trial as a more intuitive proportion of preserved fuel).

1095  
1096 If a cursor does not provide a single linear displacement solution, its optimal route instead  
1097 comprises a two-pulse sequence using its two vectors that most closely align with the trajectory of  
1098 the SG, i.e., the two vectors ( $v_1$  and  $v_2$ ) with the smallest "offset" values ( $\theta_1$  and  $\theta_2$ ) as computed  
1099 in Figure 2b. The shortest combined displacement of these two vectors that moves a cursor from  
1100 S to its most nearby Euclidean point on the circular threshold around G ( $G^{**}$ ) can be computed by  
1101 first originating  $v_1$  at S and  $v_2$  at  $G^{**}$  and finding where they intersect ( $\cap$ ). Forming an oblique  
1102 triangle with lines  $|S\cap|$ ,  $|\cap G^{**}|$  and  $|G^{**}S|$ , the length of  $|S\cap|$  and  $|\cap G^{**}|$  (i.e., the singular  
1103 displacements of  $v_1$  and  $v_2$ ) can then be solved using the law of sines, i.e.,  $|S\cap| = |G^{**}S| * \sin(\theta_2)/\sin(60)$   
1104 and  $|\cap G^{**}| = |G^{**}S| * \sin(\theta_1)/\sin(60)$ . Optimal throttle sequence with these  
1105 vectors is a vector of pulses ( $T_{opt}$ ) containing  $[t_{v1}, t_{v2}]$ , respectively solved with the lowest  $[\lambda_1, \lambda_2]$   
1106 values such that  $\sum_0^{\lambda_1} D_{\lambda}^* > D_{v1}/2$  and  $\sum_0^{\lambda_2} D_{\lambda}^* > D_{v2}/2$ , where  $D_{v1}$  is the Euclidean distance  
1107 between S and  $\cap$ , and  $D_{v2}$  is the Euclidean distance between  $\cap$  and  $G^{**}$ . Given that  $\lambda_2$  is calculated  
1108 from 0 velocity, the optimal sequence pulses  $v_2$  immediately upon the release of  $v_1$ . We subtract  
1109  $\lambda_{total}$  from 360 as our final estimate of the reward obtainable from the optimal route, where  
1110  $\lambda_{total} = \lambda_1 + \lambda_2$ .

1111  
1112 In most cases  $\lambda_{total}$  is the same value whether using the above order, or by originating  $v_2$  at S and  
1113  $v_1$  at  $G^{**}$ , and estimating  $[t_{v2}, t_{v1}]$  relative to the resulting intersection ( $\cap'$ ). The exception occurs  
1114 when one intersection ( $\cap$  or  $\cap'$ ) falls outside the grid, requiring more than one direction change to  
1115 avoid catastrophic error with this sequence. However, all trials had at least one sequence with an  
1116 intersection inside the grid for each cursor, i.e., at least one optimal path involving a single  
1117 direction change. Our modeling framework simply required the lowest  $\lambda_{total}$  for each cursor on each  
1118 trial, i.e., either  $\lambda$  from a single linear displacement,  $\lambda_{total}$  for either route if both intersections fall  
1119 within the grid, or  $\lambda_{total}$  corresponding to the route with its intersection inside the grid, if one fell  
1120 outside it.
